# Supplementary material for: Linking education and hospital data in England: linkage process and quality
Source: PubMed Central journal article supplement — Int J Popul Data Sci. 2021 Sep 16;6(1):1671. doi: 10.23889/ijpds.v6i1.1671 (PMC8445153; doi:10.23889/ijpds.v6i1.1671), 2021-09-16

## Online Only Supplemental Appendix

### Supplementary Appendix 1: Description of linkage bridging files transferred to UCL Data Safe Haven and to the Office of National Statistics Secure Research Service

As described in Figure 1, NHS Digital transferred two linkage bridging files to UCL Data Safe Haven (DSH). The first file contained the results of the first two linkage stages (See Tables 1 and Tables 2). This file included the link results when steps in Table 1 allow to link an NPD record to one PDS record only.

To remove potential duplicate HES IDs for the same pupil, a second linkage bridging file was created by NHS Digital and sent to UCL DSH. This second file included the link result in which only a modified step 1 of Table 1 was run, allowing an NPD record to link to many PDS records. Steps 2-8 in Table 1 were not run, and steps 1-7 in Table 2 were repeated.

### Supplementary Appendix 2: Timelines of the four cohorts alongside availability of data from Hospital Episode Statistics, National Pupil Dataset data and Personal Demographics Service

Supplementary Figure 1 shows timelines of the four cohorts alongside availability of data from HES (Grey), DfE NPD data (Green) and PDS (Yellow).

#### Cohort 1

This cohort includes young people born between 01/09/1990-31/08/1991 who entered reception class in September 1996. These young people are captured in HES on their first hospitalisation on or after 01/04/1997 (at approximately 7 years of age or more). These children are first recorded in the NPD with their KS1 and KS2 data from 1998 and 2002,

respectively, and annual school census from 2001/2 onwards. This cohort tests linkage with all children (state and non-state educated) who have a KS4 assessment (approximately 99% of adolescents aged 15/16). The other cohorts only capture children attending state schools (around 92% of the population). The cohort also tests linkage with young people receiving higher education up to age 18 years, a group who are likely to move and who have relatively high rates of admission to hospital.

#### Cohort 2

This cohort comprises children born between 01/09/1996-31/08/1997 who entered reception class in September 2002. These children are recorded in the NPD annual school census from 2001/2 and in KS1 data from 2003/4. These children enter secondary school in September 2008 and have KS3 recorded in 2011 and KS4 recorded in 2012/13. Data on hospitalisations is captured in HES on or after 01/04/1997 (at least approximately 1 year of age) until the most recent data extract available. This cohort has annual Pupil Level Annual School Census (PLASC) census data throughout the primary school years, but not all have had a hospital admission.

#### Cohort 3

These children are born between 01/09/1999-31/08/2000 and enter NPD in the school census at reception in September 2005. This cohort captures indicators of chronic conditions recorded in the birth record and in infancy, which is the period when the risk of admission to hospital is the highest. These children are recorded in KS1, KS2, KS3 and KS4 data from 2006/07, 2010/11, 2013/14, and 2015/16, respectively.

#### Cohort 4

These children were born between 01/09/2004-31/08/2005 and entered NPD in the school census at reception in September 2010. NPD are requested up until KS2 data which will end in 2015/16. This cohort data in HES and PDS is concurrent, and therefore we expect a higher likelihood of successful linkage.

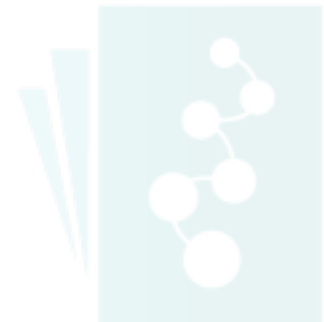

Supplementary Figure S1: Timelines of the four cohorts alongside availability of data from HES (Grey), DfE NPD data (Green) and PDS (Yellow)

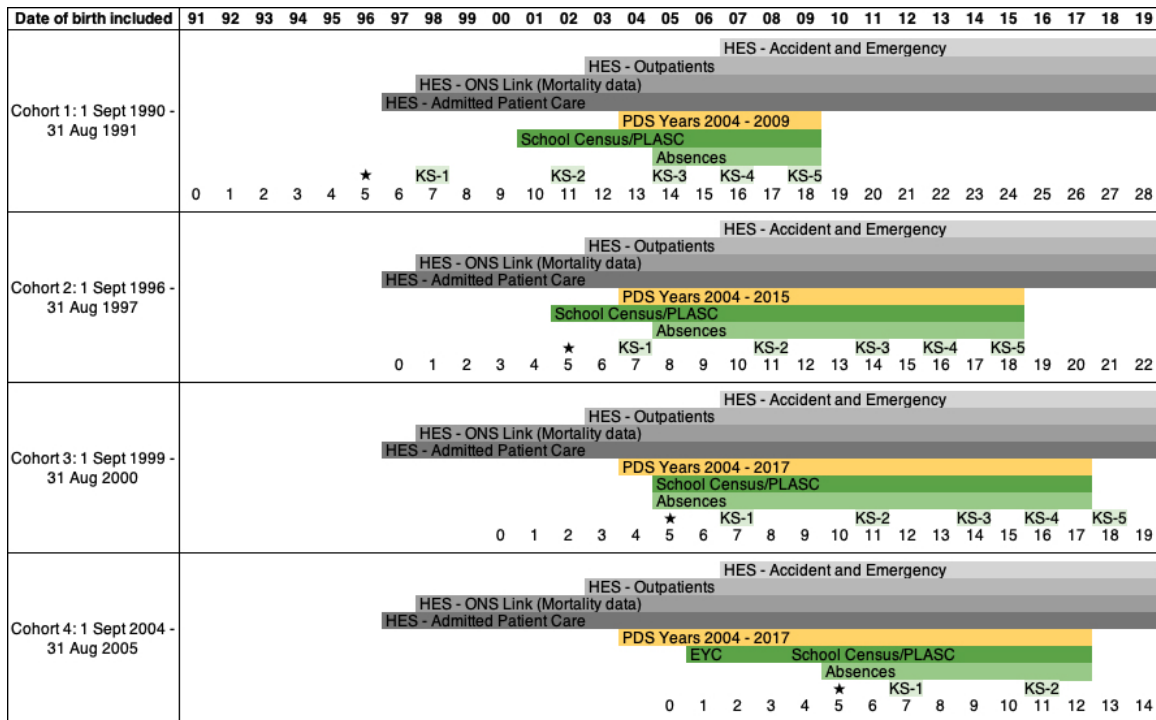

Notes: This figure show the timelines of the four cohorts alongside availability of data from the three sources HES, PDS and NPD for each year on the 1 April. Cohort 1: young people born between 01/09/1990-31/08/1991 who entered reception class in September 1996. DfE NPD extracts include all pupils in Year 6 in 2001/02 as a proxy for those in reception year in 1995/96. Cohort 2: children born between 01/09/1996-31/08/1997 who entered reception class in September 2002. Cohort 3: children are born between 01/09/1999-31/08/2000 and enter NPD in the school census at reception in September 2005. Cohort 4: children are born between 01/09/2004-31/08/2005 and enter NPD in the school census at reception in September 2010. Numbers in last row for each cohort correspond to age of child. Black stars are point of entry to reception. NPD National Pupil Dataset; PDS Personal Demographics Service; HES Hospital Episode Statistics; NHS National Health Service; ONS Office for National Statistics; APC Admitted Patient Care; A&E Accident and Emergency; EYC Early Year Census; EYFSP Early years foundation stage profile; KS Key Stage.

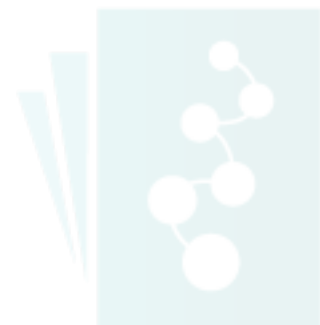

## Supplementary Appendix 3: Description of data resources used in the linkage

Supplementary Table 1: Description of data resources used in the linkage

| Data       | Population                             | Years collected                                                                                                                                                                                                                                                                                                                                                                            | Data captured                                                                                                                                                                                                                                                                                                                                                                                                                                                                                                                     | Identifiers                                                                                                                                                                                                        |
|------------|----------------------------------------|--------------------------------------------------------------------------------------------------------------------------------------------------------------------------------------------------------------------------------------------------------------------------------------------------------------------------------------------------------------------------------------------|-----------------------------------------------------------------------------------------------------------------------------------------------------------------------------------------------------------------------------------------------------------------------------------------------------------------------------------------------------------------------------------------------------------------------------------------------------------------------------------------------------------------------------------|--------------------------------------------------------------------------------------------------------------------------------------------------------------------------------------------------------------------|
| <b>NPD</b> | All pupils in England in state schools | School Census/PLASC: 2002 onwards<br>Early Year Census (EYC): 2008-2013 only for 3- and 4-year-olds, and 2014 onwards for all pupils<br><br>Absences: 2006 onwards (exclusions, 2002 onwards)<br>Attainment:<br>EYFSP: 2003–2006 for only 10% of pupils, 2007 onwards for all pupils<br>KS1: 1998 onwards<br>KS2: 1996 onwards<br>KS3: 1998-2013<br>KS4: 2000 onwards<br>KS5: 2001 onwards | Information about all pupils who are currently at school from reception to progression at each key stage. Pupil level data on demographic and personal details, school attended, as well as whether the pupil receives support for special educational needs and/or eligibility for receiving free school meals. Pupil level data on absences and exclusions per term.<br><br>Pupil level data on attainment at the EYFSP (ages 3 to 5) and Key Stages 1 to 5 (ages 7 to 18).                                                     | First name(s), surname(s), date of birth, sex, residence postcodes history, residence postcodes dates entered each term.                                                                                           |
| <b>HES</b> | All activity in English hospitals      | APC (Inpatients): April 1997 onwards*<br><br>HES-ONS link mortality: 1997 onwards<br>Outpatients: 2003 onwards<br><br>A&E: 2010 onwards**                                                                                                                                                                                                                                                  | Episode level data on all inpatient and day case discharges; information relating to admissions such as admission type, date, reason; clinical information such as diagnosis and procedure codes and demographic data.<br>Deaths records of patients in English hospitals.<br>Information on type of outpatient appointment, the main speciality, treatment speciality, referral source, waiting times, diagnosis and procedures.<br>Records of each A&E attendance, time and method of arrival and departure, time spent in A&E. | First name(s), surname(s), date of birth, sex, residence postcode, NHS number entered for each NHS contact.                                                                                                        |
| <b>PDS</b> | All NHS patients                       | 2004 onwards                                                                                                                                                                                                                                                                                                                                                                               | Demographic data of users of health and care services in England.                                                                                                                                                                                                                                                                                                                                                                                                                                                                 | First name(s), surname(s), date of birth, sex, residence postcodes history, residence postcodes dates, address, NHS number entered each time GP registration is updated, or a hospital enters a different address. |

Notes: \* APC (Inpatient) data has been collected since 1989 onwards. However, it can be linked only from 1997 due to the introduction of NHS numbers, which is an important element in the linkage of data. \*\* A&E collection was first started in 2007 but the coverage and quality improved from 2010 onwards.

NPD National Pupil Dataset; PDS Personal Demographics Service; HES Hospital Episode Statistics; NHS National Health Service; ONS Office for National Statistics; APC Admitted Patient Care; A&E Accident and Emergency; EYC Early Year Census; EYFSP Early years foundation stage profile; KS Key Stage.

Supplementary Table 2: Example of NPD linkage table

| aPMR | Cohort | First name | Surname | Date of birth | Sex | Postcode | Year* |
|------|--------|------------|---------|---------------|-----|----------|-------|
| 1    | 1      | John       | Smith   | 01/01/1988    | 1   | LS0 0AA  | 2004  |
| 1    | 1      | John       | Smith   | 01/01/1988    | 1   | LS1 1AA  | 2005  |
| 1    | 1      | John       | Jones   | 01/01/1988    | 1   | LS2 2AA  | 2006  |

Notes: All records for all pupils in all four cohorts were combined into a single table for linking (multiple rows for each pupil) \* Year refers to academic year (e.g. 2004 means 01/09/2003 – 31/08/2004, and so on for all subsequent years).

Supplementary Table 3: Example of PDS linkage table

| NHS Number | First name | Surname | Date of birth | Sex | Postcode | P/A/N Start date | P/A/N End date |
|------------|------------|---------|---------------|-----|----------|------------------|----------------|
| 123456     | John       | Smith   | 01/01/1988    | 1   | LS0 0AA  | 01/01/2004       | NULL           |
| 123456     | John       | Smith   | 01/01/1988    | 1   | LS1 1AA  | 01/01/2005       | NULL           |
| 123456     | John       | Jones   | 01/01/1988    | 1   | LS2 2AA  | 01/01/2006       | NULL           |

Notes: All records from PDS table for person, name and address were combined into a single table for linking (multiple rows for each NHS Number). NULL end dates mean that the record is current.

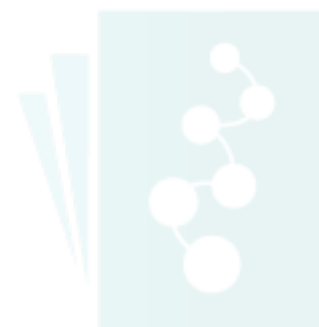

## Supplementary Appendix 4: Description of linkage between Personal Demographics Service and National Pupil Dataset

Using NPD census extracts, NHS Digital created the linkage table with identifiers for pupils in all four cohorts (Supplementary Table 2). The linkage table contained multiple rows for each pupil indicating different school censuses. For a link to be found in the linkage stage 1, besides considering the 8 steps in Table 1, the academic year from the NPD (column Year in Supplementary Table 2) needed to overlap the date intervals recorded in PDS records corresponding the period when specific demographic information was updated (see paragraph below).

Using PDS, NHS Digital created a table with patients' identifiers (Supplementary Table 3). In this table, multiple rows for each patient's NHS number were available referring to dates when specific patient demographic information was updated (date of birth, sex, address and name). For each NHS Number, when a record is updated, the date is recorded in the P/A/N Start date and the P/A/N End date variables. These two dates define intervals that we used in the linkage algorithm. An interval corresponds to the period between the P/A/N Start date and the P/A/N End date. P refers to a PDS record resulting from a person change (date of birth and sex), A refers to address change, and N refers to name change.

The linking algorithm takes into account all three PDS date types: Person (P), Name (N) and Address (A). The end date is the date P/A/N changes ceases to be applicable. The start date is the date that P/A/N changes start to be applicable. The two agreement dates in PDS, which are the starting and ending date of the academic year, ensure that the recent record is being linked from NPD to PDS.

### Criteria for agreement dates for NPD to PDS linkage

The academic year from the NPD needs to overlap the PDS date intervals for all the relevant types, i.e. Person, Name, and Address. For example, for a link to be found when looking at an NPD record for spring census 2004, the relevant data fields (i.e. a combination of name, date of birth, sex and postcode) must link and the following criterion must hold:

$$(01/09/2003 \leq P \text{ end date}) \text{ and } (P \text{ start date} \leq 31/08/2004)$$

$$\text{and } (01/09/2003 \leq A \text{ end date}) \text{ and } (A \text{ start date} \leq 31/08/2004)$$

$$\text{and } (01/09/2003 \leq N \text{ end date}) \text{ and } (N \text{ start date} \leq 31/08/2004)$$

This criterion means that the academic intervals created by P/A/N Start date and End date must be within the corresponding academic year. In Panels A and B of Supplementary Figure 2 we show examples in which the previous criteria hold.



Supplementary Figure S2: Criteria for agreement dates, example using NPD spring census 2004 and three types of PDS dates

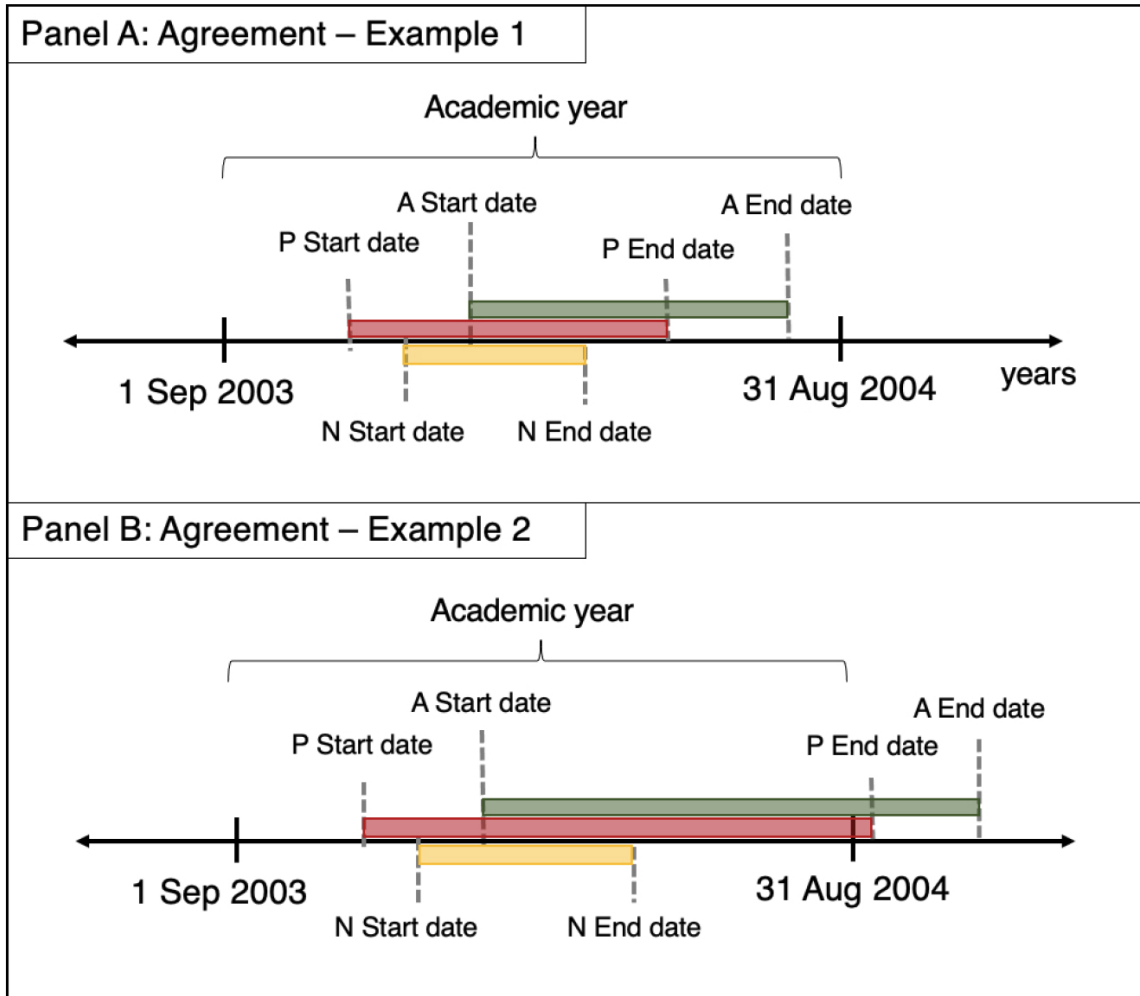

Note: This figure displays P/A/N dates for the academic years 2003/04. In this example, the agreement dates in PDS are 01/09/2003 and 31/08/2004. P = Person, N = Name, A = Address.

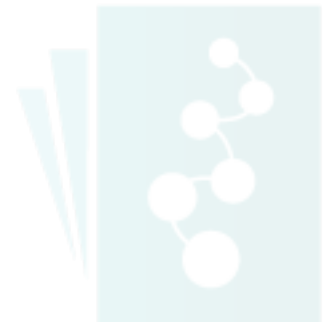

## Supplementary Appendix 5: Description of demographic variables in national pupil dataset

### Region 2011 pupil's residence

We derived the region of pupil's residence using the National Statistics Postcode Directory Lower Layer Super Output Area (*LSOA11*) derived from the pupil's postcode (based on 2011 Census). We used the first available *LSOA11* in the spring censuses.

### Ethnic group

We derived this variable as the most common recorded ethnic group in the National Pupil Database. We used *ethnicgroup* variable before 2006 and *ethnicgroupmajor\_spr* from 2006 onwards. We derived six categories to classify ethnic groups (White, Asian, Black, Chinese, Any other ethnic group, and Mixed). The following tables describe the codes assigned to each ethnic category.

### Sex and IDACI deciles

We used the *gender* variable recorded and Income Deprivation Affecting Children Indices (IDACI) deciles derived from the pupil's postcode (*IDACIRank*). We used the first available IDACI decile in the Spring censuses.

### Age at start academic year

We used the age at the start academic year (*AgeAtStartOfAcademicYear*) that was recorded in the first spring census available.

### Persistent absence

Defined as whether a child was absent in 10% or more of academic sessions.

We defined the authorised annual absence rate for all academic years available as the number of sessions missed due to authorised absence during the academic year (*AuthorisedAbsence\_3Term\_ab*) divided by the number of sessions possible for the academic year (*SessionsPossible\_3Term\_ab*). Numerator and denominator are based on all schools' termly sessions except special schools for which annual sessions' data are used.

Special Education Need (SEN); School Action or Early Years Action, School Action Plus or Early Years Action and SEN support (AAP/S); and Statement and Education, health and care plan (S/EHCP)

We derived the SEN, AAP/S and S/EHCP variables using the classification in the following table.

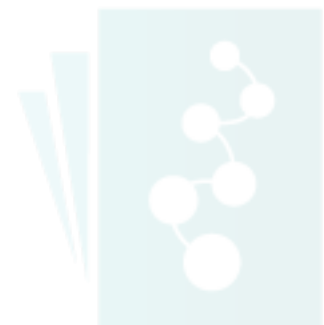

Supplementary Table 4.1: Classification of ethnic group with the *ethnicgroup* variable

| <b>ethnicgroup</b>          | <b>Ethnic group</b>    | <b>Code</b> |
|-----------------------------|------------------------|-------------|
| Any Other White Background  | White                  | 1           |
| Gypsy / Romany              | White                  | 1           |
| Irish                       | White                  | 1           |
| Traveller Of Irish Heritage | White                  | 1           |
| White British               | White                  | 1           |
| Any Other Asian Background  | Asian                  | 2           |
| Bangladeshi                 | Asian                  | 2           |
| Indian                      | Asian                  | 2           |
| Pakistani                   | Asian                  | 2           |
| African                     | Black                  | 3           |
| Any Other Black Background  | Black                  | 3           |
| Caribbean                   | Black                  | 3           |
| Chinese                     | Chinese                | 4           |
| Any Other Ethnic Group      | Any other ethnic group | 5           |
| Any Other Mixed Background  | Mixed                  | 6           |
| White and Asian             | Mixed                  | 6           |
| White and Black African     | Mixed                  | 6           |
| White and Black Caribbean   | Mixed                  | 6           |
| Information Not Obtained    | Missing                | 7           |
| Missing                     | Missing                | 7           |
| Refused                     | Missing                | 7           |

Supplementary Table 4.2: Classification of ethnic group with the *ethnicgroupmajor* variable

| <b>ethnicgroupmajor</b> | <b>Ethnic group</b>    | <b>Code</b> |
|-------------------------|------------------------|-------------|
| WHIT                    | White                  | 1           |
| ASIA                    | Asian                  | 2           |
| BLAC                    | Black                  | 3           |
| CHIN                    | Chinese                | 4           |
| AOEG                    | Any Other Ethnic Group | 5           |
| MIXD                    | Mixed                  | 6           |
| UNCL                    | Missing                | 7           |

Supplementary Table 4.3: Classification of SEN, AAP/S and S/EHCP variables

| <b>Description</b>                                                  | <b>Code</b> | <b>SEN:<br/>special<br/>education<br/>need</b> | <b>AAP/S: School action or<br/>early years action, school action<br/>plus or early years action<br/>and SEN support</b> | <b>S/EHCP:<br/>statement and<br/>education, health<br/>and care plan</b> |
|---------------------------------------------------------------------|-------------|------------------------------------------------|-------------------------------------------------------------------------------------------------------------------------|--------------------------------------------------------------------------|
| No Special Educational Need                                         | N           |                                                |                                                                                                                         |                                                                          |
| School Action or Early Years<br>Action (up to 2014/15)              | A           | x                                              | x                                                                                                                       |                                                                          |
| School Action Plus or Early<br>Years Action Plus (up to<br>2014/15) | P           | x                                              | x                                                                                                                       |                                                                          |
| SEN support (since 2014/15)                                         | K           | x                                              | x                                                                                                                       |                                                                          |
| Statement (up to 2017/18)                                           | S           | x                                              |                                                                                                                         | x                                                                        |
| Education, health and care<br>plan (since 2014/15)                  | E           | x                                              |                                                                                                                         | x                                                                        |

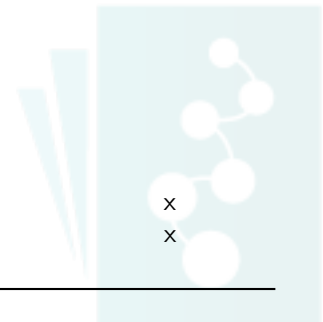



**Supplementary Appendix 6. Performance of linkage stages**

Supplementary Table 5.1: Pupils records by linkage stage (stages 1 and 2) and cohort

| Cohort          | Linked NPD-PDS-HES (unique aPMR) | Excluded as a fail to link PDS (stage 1) | Excluded as fail to link HES (stage 2) | Total (unique aPMR) |
|-----------------|----------------------------------|------------------------------------------|----------------------------------------|---------------------|
| 1               | 571,713                          | 20,244                                   | 20,815                                 | 612,772             |
| 2               | 542,035                          | 8,868                                    | 19,839                                 | 570,742             |
| 3               | 512,526                          | 683                                      | 14,858                                 | 528,067             |
| 4               | 569,851                          | 528                                      | 5,711                                  | 576,090             |
| Total           | 2,196,125                        | 30,323                                   | 61,223                                 | 2,287,671           |
| Row percentages |                                  |                                          |                                        |                     |
| 1               | 93.3                             | 3.3                                      | 3.4                                    | 100.0               |
| 2               | 95.0                             | 1.6                                      | 3.5                                    | 100.0               |
| 3               | 97.1                             | 0.1                                      | 2.8                                    | 100.0               |
| 4               | 98.9                             | 0.1                                      | 1.0                                    | 100.0               |
| Total           | 96.0                             | 1.3                                      | 2.7                                    | 100.0               |

  

| Cohort          | Linked NPD-PDS-HES (all pairs) | Excluded as a fail to link PDS (stage 1) | Excluded as fail to link HES (stage 2) | Total (all pairs) |
|-----------------|--------------------------------|------------------------------------------|----------------------------------------|-------------------|
| 1               | 572,673                        | 20,244                                   | 20,815                                 | 613,732           |
| 2               | 543,211                        | 8,868                                    | 19,839                                 | 571,918           |
| 3               | 514,369                        | 683                                      | 14,858                                 | 529,910           |
| 4               | 572,570                        | 528                                      | 5,711                                  | 578,809           |
| Total           | 2,202,823                      | 30,323                                   | 61,223                                 | 2,294,369         |
| Row percentages |                                |                                          |                                        |                   |
| 1               | 93.3                           | 3.3                                      | 3.4                                    | 100.0             |
| 2               | 95.0                           | 1.6                                      | 3.5                                    | 100.0             |
| 3               | 97.1                           | 0.1                                      | 2.8                                    | 100.0             |
| 4               | 98.9                           | 0.1                                      | 1.0                                    | 100.0             |
| Total           | 96.0                           | 1.3                                      | 2.7                                    | 100.0             |

Notes: NPD = national pupil dataset; PDS = personal demographics service; HES = hospital episode statistics.

Supplementary Table 5.2: Pupils records by linkage stage (stages 1 and 2), merging stage and cohort

| Cohort          | Linked NPD-HES | Excluded as a fail to link PDS (stage 1) | Excluded as fail to link HES (stage 2) | Not merged to UCL-HES (merging stage) | Total (unique aPMR) |
|-----------------|----------------|------------------------------------------|----------------------------------------|---------------------------------------|---------------------|
| 1               | 564,931        | 20,244                                   | 20,815                                 | 6,782                                 | 612,772             |
| 2               | 535,610        | 8,868                                    | 19,839                                 | 6,425                                 | 570,742             |
| 3               | 506,215        | 683                                      | 14,858                                 | 6,311                                 | 528,067             |
| 4               | 567,845        | 528                                      | 5,711                                  | 2,006                                 | 576,090             |
| Total           | 2,174,601      | 30,323                                   | 61,223                                 | 21,524                                | 2,287,671           |
| Row percentages |                |                                          |                                        |                                       |                     |
| 1               | 92.2           | 3.3                                      | 3.4                                    | 1.1                                   | 100.0               |
| 2               | 93.8           | 1.6                                      | 3.5                                    | 1.1                                   | 100.0               |
| 3               | 95.9           | 0.1                                      | 2.8                                    | 1.2                                   | 100.0               |
| 4               | 98.6           | 0.1                                      | 1.0                                    | 0.3                                   | 100.0               |
| Total           | 95.1           | 1.3                                      | 2.7                                    | 0.9                                   | 100.0               |

Notes: NPD = national pupil dataset; PDS = personal demographics service; HES = hospital episode statistics.

Supplementary Table 6.1: Linkage national pupil dataset to personal demographics service by linkage step and cohort (all pairs)

| Linkage step | Cohort (N) |         |         |         |           | Cohort (%) |       |       |       |       |
|--------------|------------|---------|---------|---------|-----------|------------|-------|-------|-------|-------|
|              | 90/91      | 96/97   | 99/00   | 04/05   | Total     | 90/91      | 96/97 | 99/00 | 04/05 | Total |
| 1            | 541,397    | 539,166 | 509,884 | 548,099 | 2,138,546 | 91.2       | 95.8  | 96.4  | 94.8  | 94.5  |
| 2            | 14,968     | 10,304  | 9,007   | 12,564  | 46,843    | 2.5        | 1.8   | 1.7   | 2.2   | 2.1   |
| 3            | 3,945      | 2,226   | 1,849   | 2,257   | 10,277    | 0.7        | 0.4   | 0.4   | 0.4   | 0.5   |
| 4            | 173        | 107     | 177     | 503     | 960       | 0.0        | 0.0   | 0.0   | 0.1   | 0.0   |
| 5            | 8,532      | 4,835   | 3,887   | 5,617   | 22,871    | 1.4        | 0.9   | 0.7   | 1.0   | 1.0   |
| 6            | 3,582      | 1,288   | 1,016   | 2,147   | 8,033     | 0.6        | 0.2   | 0.2   | 0.4   | 0.4   |
| 7            | 19,222     | 4,694   | 3,096   | 6,510   | 33,522    | 3.2        | 0.8   | 0.6   | 1.1   | 1.5   |
| 8            | 1,669      | 430     | 311     | 584     | 2,994     | 0.3        | 0.1   | 0.1   | 0.1   | 0.1   |
| Total        | 593,488    | 563,050 | 529,227 | 578,281 | 2,264,046 | 100.0      | 100.0 | 100.0 | 100.0 | 100.0 |

Note: The table includes successful linked records.

Supplementary Table 6.2: Linkage national pupil dataset to personal demographics service by academic year of linkage step and cohort (all pairs)

| Academic year of linkage step | Cohort (N) |         |         |         |           | Cohort (%) |       |       |       |       |
|-------------------------------|------------|---------|---------|---------|-----------|------------|-------|-------|-------|-------|
|                               | 90/91      | 96/97   | 99/00   | 04/05   | Total     | 90/91      | 96/97 | 99/00 | 04/05 | Total |
| 2004                          | 503,135    | 441,016 | 179,013 | 0       | 1,123,164 | 84.8       | 78.3  | 33.8  | 0.0   | 49.6  |
| 2005                          | 34,458     | 40,140  | 262,752 | 0       | 337,351   | 5.8        | 7.1   | 49.7  | 0.0   | 14.9  |
| 2006                          | 16,444     | 18,744  | 23,689  | 0       | 58,877    | 2.8        | 3.3   | 4.5   | 0.0   | 2.6   |
| 2007                          | 12,676     | 14,434  | 15,735  | 0       | 42,846    | 2.1        | 2.6   | 3.0   | 0.0   | 1.9   |
| 2008                          | 4,312      | 11,561  | 11,246  | 0       | 27,119    | 0.7        | 2.1   | 2.1   | 0.0   | 1.2   |
| 2009                          | 1,572      | 18,223  | 7,369   | 228,484 | 255,646   | 0.3        | 3.2   | 1.4   | 39.5  | 11.3  |
| 2010                          | 0          | 5,047   | 5,825   | 292,282 | 303,154   | 0.0        | 0.9   | 1.1   | 50.5  | 13.4  |
| 2011                          | 0          | 3,423   | 5,579   | 18,952  | 27,954    | 0.0        | 0.6   | 1.1   | 3.3   | 1.2   |
| 2012                          | 0          | 2,046   | 6,137   | 6,688   | 14,871    | 0.0        | 0.4   | 1.2   | 1.2   | 0.7   |
| 2013                          | 0          | 1,725   | 2,394   | 9,397   | 13,516    | 0.0        | 0.3   | 0.5   | 1.6   | 0.6   |
| 2014                          | 0          | 1,032   | 1,828   | 4,542   | 7,402     | 0.0        | 0.2   | 0.4   | 0.8   | 0.3   |
| 2015                          | 0          | 535     | 2,582   | 5,324   | 8,441     | 0.0        | 0.1   | 0.5   | 0.9   | 0.4   |
| 2016                          | 0          | 0       | 1,475   | 4,361   | 5,836     | 0.0        | 0.0   | 0.3   | 0.8   | 0.3   |
| 2017                          | 0          | 0       | 128     | 879     | 1,007     | 0.0        | 0.0   | 0.0   | 0.2   | 0.0   |
| 2018                          | 0          | 0       | 68      | 278     | 346       | 0.0        | 0.0   | 0.0   | 0.1   | 0.0   |
| 9999                          | 20,891     | 5,124   | 3,407   | 7,094   | 36,516    | 3.5        | 0.9   | 0.6   | 1.2   | 1.6   |
| Total                         | 593,488    | 563,050 | 529,227 | 578,281 | 2,264,046 | 100.0      | 100.0 | 100.0 | 100.0 | 100.0 |

Note: The table includes successful linked records.



Supplementary Table 6.3: Linkage national pupil dataset to personal demographics service by linkage step and ethnicity (all pairs)

| <b>Linkage step</b>       | <b>White</b>     | <b>Asian</b>   | <b>Black</b>  | <b>Chinese</b> | <b>Any other ethnic group</b> | <b>Mixed</b>  | <b>Missing</b> | <b>Total</b>     |
|---------------------------|------------------|----------------|---------------|----------------|-------------------------------|---------------|----------------|------------------|
| <b>Records (N)</b>        |                  |                |               |                |                               |               |                |                  |
| 1                         | 1,783,487        | 157,904        | 80,501        | 6,196          | 19,298                        | 80,098        | 11,062         | 2,138,546        |
| 2                         | 28,274           | 8,204          | 5,393         | 216            | 1,609                         | 2,781         | 366            | 46,843           |
| 3                         | 6,400            | 2,006          | 1,009         | 113            | 274                           | 383           | 92             | 10,277           |
| 4                         | 432              | 227            | 172           | 0              | 53                            | 57            | 19             | 960              |
| 5                         | 9,281            | 7,273          | 3,664         | 313            | 862                           | 1,285         | 193            | 22,871           |
| 6                         | 5,557            | 988            | 753           | 36             | 230                           | 376           | 93             | 8,033            |
| 7                         | 26,620           | 2,355          | 2,022         | 169            | 418                           | 1,361         | 577            | 33,522           |
| 8                         | 1,704            | 430            | 459           | 14             | 134                           | 176           | 77             | 2,994            |
| <b>Total</b>              | <b>1,861,755</b> | <b>179,387</b> | <b>93,973</b> | <b>7,057</b>   | <b>22,878</b>                 | <b>86,517</b> | <b>12,479</b>  | <b>2,264,046</b> |
| <b>Row percentages</b>    |                  |                |               |                |                               |               |                |                  |
| 1                         | 83.4             | 7.4            | 3.8           | 0.3            | 0.9                           | 3.7           | 0.5            | 100.0            |
| 2                         | 60.4             | 17.5           | 11.5          | 0.5            | 3.4                           | 5.9           | 0.8            | 100.0            |
| 3                         | 62.3             | 19.5           | 9.8           | 1.1            | 2.7                           | 3.7           | 0.9            | 100.0            |
| 4                         | 45.0             | 23.6           | 17.9          | 0.0            | 5.5                           | 5.9           | 2.0            | 100.0            |
| 5                         | 40.6             | 31.8           | 16.0          | 1.4            | 3.8                           | 5.6           | 0.8            | 100.0            |
| 6                         | 69.2             | 12.3           | 9.4           | 0.4            | 2.9                           | 4.7           | 1.2            | 100.0            |
| 7                         | 79.4             | 7.0            | 6.0           | 0.5            | 1.2                           | 4.1           | 1.7            | 100.0            |
| 8                         | 56.9             | 14.4           | 15.3          | 0.5            | 4.5                           | 5.9           | 2.6            | 100.0            |
| <b>Total</b>              | <b>82.2</b>      | <b>7.9</b>     | <b>4.2</b>    | <b>0.3</b>     | <b>1.0</b>                    | <b>3.8</b>    | <b>0.6</b>     | <b>100.0</b>     |
| <b>Column percentages</b> |                  |                |               |                |                               |               |                |                  |
| 1                         | 95.8             | 88.0           | 85.7          | 87.8           | 84.4                          | 92.6          | 88.6           | 94.5             |
| 2                         | 1.5              | 4.6            | 5.7           | 3.1            | 7.0                           | 3.2           | 2.9            | 2.1              |
| 3                         | 0.3              | 1.1            | 1.1           | 1.6            | 1.2                           | 0.4           | 0.7            | 0.5              |
| 4                         | 0.0              | 0.1            | 0.2           | 0.0            | 0.2                           | 0.1           | 0.2            | 0.0              |
| 5                         | 0.5              | 4.1            | 3.9           | 4.4            | 3.8                           | 1.5           | 1.5            | 1.0              |
| 6                         | 0.3              | 0.6            | 0.8           | 0.5            | 1.0                           | 0.4           | 0.7            | 0.4              |
| 7                         | 1.4              | 1.3            | 2.2           | 2.4            | 1.8                           | 1.6           | 4.6            | 1.5              |
| 8                         | 0.1              | 0.2            | 0.5           | 0.2            | 0.6                           | 0.2           | 0.6            | 0.1              |
| <b>Total</b>              | <b>100.0</b>     | <b>100.0</b>   | <b>100.0</b>  | <b>100.0</b>   | <b>100.0</b>                  | <b>100.0</b>  | <b>100.0</b>   | <b>100.0</b>     |

Note: The table includes successful linked records.

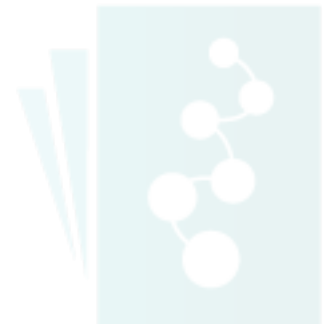

Supplementary Table 6.4: Linkage national pupil dataset to personal demographics service by linkage step and region (all pairs)

| Linkage step       | London  | South East | South West | West Midlands | North West | North East | Yorkshire and The Humber | East Midlands | East of England | Wales | Missing | Total     |
|--------------------|---------|------------|------------|---------------|------------|------------|--------------------------|---------------|-----------------|-------|---------|-----------|
| Records (n)        |         |            |            |               |            |            |                          |               |                 |       |         |           |
| 1                  | 278,298 | 315,432    | 196,505    | 233,888       | 297,522    | 104,861    | 213,681                  | 175,180       | 225,551         | 193   | 97,435  | 2,138,546 |
| 2                  | 11,609  | 5,149      | 2,934      | 5,004         | 6,838      | 1,861      | 4,449                    | 2,893         | 3,406           | 0     | 2,700   | 46,843    |
| 3                  | 2,673   | 1,173      | 740        | 965           | 1,435      | 386        | 863                      | 609           | 858             | 0     | 575     | 10,277    |
| 4                  | 340     | 64         | 35         | 130           | 121        | 28         | 90                       | 33            | 62              | 0     | 57      | 960       |
| 5                  | 6,599   | 1,976      | 901        | 2,489         | 3,503      | 831        | 2,374                    | 1,205         | 1,421           | 0     | 1,572   | 22,871    |
| 6                  | 1,766   | 876        | 531        | 930           | 1,336      | 352        | 701                      | 439           | 631             | 0     | 471     | 8,033     |
| 7                  | 5,770   | 4,424      | 2,726      | 3,658         | 5,611      | 1,367      | 2,728                    | 2,045         | 2,970           | 21    | 2,202   | 33,522    |
| 8                  | 871     | 267        | 151        | 266           | 464        | 78         | 214                      | 135           | 273             | 0     | 275     | 2,994     |
| Total              | 307,926 | 329,361    | 204,523    | 247,330       | 316,830    | 109,764    | 225,100                  | 182,539       | 235,172         | 214   | 105,287 | 2,264,046 |
| Row percentages    |         |            |            |               |            |            |                          |               |                 |       |         |           |
| 1                  | 13.0    | 14.7       | 9.2        | 10.9          | 13.9       | 4.9        | 10.0                     | 8.2           | 10.5            | 0.0   | 4.6     | 100.0     |
| 2                  | 24.8    | 11.0       | 6.3        | 10.7          | 14.6       | 4.0        | 9.5                      | 6.2           | 7.3             | 0.0   | 5.8     | 100.0     |
| 3                  | 26.0    | 11.4       | 7.2        | 9.4           | 14.0       | 3.8        | 8.4                      | 5.9           | 8.3             | 0.0   | 5.6     | 100.0     |
| 4                  | 35.4    | 6.7        | 3.6        | 13.5          | 12.6       | 2.9        | 9.4                      | 3.4           | 6.5             | 0.0   | 5.9     | 100.0     |
| 5                  | 28.9    | 8.6        | 3.9        | 10.9          | 15.3       | 3.6        | 10.4                     | 5.3           | 6.2             | 0.0   | 6.9     | 100.0     |
| 6                  | 22.0    | 10.9       | 6.6        | 11.6          | 16.6       | 4.4        | 8.7                      | 5.5           | 7.9             | 0.0   | 5.9     | 100.0     |
| 7                  | 17.2    | 13.2       | 8.1        | 10.9          | 16.7       | 4.1        | 8.1                      | 6.1           | 8.9             | 0.1   | 6.6     | 100.0     |
| 8                  | 29.1    | 8.9        | 5.0        | 8.9           | 15.5       | 2.6        | 7.1                      | 4.5           | 9.1             | 0.0   | 9.2     | 100.0     |
| Total              | 13.6    | 14.5       | 9.0        | 10.9          | 14.0       | 4.8        | 9.9                      | 8.1           | 10.4            | 0.0   | 4.7     | 100.0     |
| Column percentages |         |            |            |               |            |            |                          |               |                 |       |         |           |
| 1                  | 90.4    | 95.8       | 96.1       | 94.6          | 93.9       | 95.5       | 94.9                     | 96.0          | 95.9            | 90.2  | 92.5    | 94.5      |
| 2                  | 3.8     | 1.6        | 1.4        | 2.0           | 2.2        | 1.7        | 2.0                      | 1.6           | 1.4             | 0.0   | 2.6     | 2.1       |
| 3                  | 0.9     | 0.4        | 0.4        | 0.4           | 0.5        | 0.4        | 0.4                      | 0.3           | 0.4             | 0.0   | 0.5     | 0.5       |
| 4                  | 0.1     | 0.0        | 0.0        | 0.1           | 0.0        | 0.0        | 0.0                      | 0.0           | 0.0             | 0.0   | 0.1     | 0.0       |
| 5                  | 2.1     | 0.6        | 0.4        | 1.0           | 1.1        | 0.8        | 1.1                      | 0.7           | 0.6             | 0.0   | 1.5     | 1.0       |
| 6                  | 0.6     | 0.3        | 0.3        | 0.4           | 0.4        | 0.3        | 0.3                      | 0.2           | 0.3             | 0.0   | 0.4     | 0.4       |
| 7                  | 1.9     | 1.3        | 1.3        | 1.5           | 1.8        | 1.2        | 1.2                      | 1.1           | 1.3             | 9.8   | 2.1     | 1.5       |
| 8                  | 0.3     | 0.1        | 0.1        | 0.1           | 0.1        | 0.1        | 0.1                      | 0.1           | 0.1             | 0.0   | 0.3     | 0.1       |
| Total              | 100.0   | 100.0      | 100.0      | 100.0         | 100.0      | 100.0      | 100.0                    | 100.0         | 100.0           | 100.0 | 100.0   | 100.0     |

Note: The table includes successful linked records.

Supplementary Table 7.1: Linkage personal demographics service to hospital episode statistics by linkage step and cohort (all pairs)

| Linkage step | Cohort (N) |         |         |         |           | Cohort (%) |       |       |       |       |
|--------------|------------|---------|---------|---------|-----------|------------|-------|-------|-------|-------|
|              | 90/91      | 96/97   | 99/00   | 04/05   | Total     | 90/91      | 96/97 | 99/00 | 04/05 | Total |
| 1            | 455,015    | 435,678 | 412,723 | 488,064 | 1,791,480 | 79.45      | 80.2  | 80.24 | 85.24 | 81.33 |
| 2            | 112,446    | 100,895 | 92,854  | 80,384  | 386,579   | 19.64      | 18.57 | 18.05 | 14.04 | 17.55 |
| 3            | 2,080      | 863     | 727     | 1,705   | 5,375     | 0.36       | 0.16  | 0.14  | 0.3   | 0.24  |
| 4            | 656        | 305     | 269     | 443     | 1,673     | 0.11       | 0.06  | 0.05  | 0.08  | 0.08  |
| 5            | 179        | 190     | 234     | 515     | 1,118     | 0.03       | 0.03  | 0.05  | 0.09  | 0.05  |
| 6            | 2,181      | 5,059   | 7,314   | 1,266   | 15,820    | 0.38       | 0.93  | 1.42  | 0.22  | 0.72  |
| 7            | 47         | 97      | 135     | 24      | 303       | 0.01       | 0.02  | 0.03  | 0     | 0.01  |
| 8            | 69         | 124     | 113     | 169     | 475       | 0.01       | 0.02  | 0.02  | 0.03  | 0.02  |
| Total        | 572,673    | 543,211 | 514,369 | 572,570 | 2,202,823 | 100        | 100   | 100   | 100   | 100   |

Note: The table includes successful linked records.

Supplementary Table 7.2: Linkage personal demographics service to hospital episode statistics by linkage step and ethnicity (all pairs)

| Linkage step       | White     | Asian   | Black  | Chinese | Any other ethnic group | Mixed  | Missing | Total     |
|--------------------|-----------|---------|--------|---------|------------------------|--------|---------|-----------|
| Records (n)        |           |         |        |         |                        |        |         |           |
| 1                  | 1,481,539 | 144,364 | 68,528 | 5,055   | 16,422                 | 66,366 | 9,206   | 1,791,480 |
| 2                  | 315,316   | 26,125  | 20,160 | 1,323   | 4,508                  | 16,671 | 2,476   | 386,579   |
| 3                  | 3,716     | 689     | 508    | 32      | 128                    | 246    | 56      | 5,375     |
| 4                  | 1,119     | 205     | 194    | 0       | 52                     | 89     | 14      | 1,673     |
| 5                  | 660       | 195     | 138    | 0       | 47                     | 66     | 12      | 1,118     |
| 6                  | 11,333    | 2,083   | 1,268  | 114     | 302                    | 626    | 94      | 15,820    |
| 7                  | 233       | 33      | 18     | 0       | 0                      | 19     | 0       | 303       |
| 8                  | 300       | 69      | 59     | 0       | 15                     | 32     | 0       | 475       |
| Total              | 1,814,216 | 173,763 | 90,873 | 6,524   | 21,474                 | 84,115 | 11,858  | 2,202,823 |
| Row percentages    |           |         |        |         |                        |        |         |           |
| 1                  | 82.7      | 8.1     | 3.8    | 0.3     | 0.9                    | 3.7    | 0.5     | 100.0     |
| 2                  | 81.6      | 6.8     | 5.2    | 0.3     | 1.2                    | 4.3    | 0.6     | 100.0     |
| 3                  | 69.1      | 12.8    | 9.5    | 0.6     | 2.4                    | 4.6    | 1.0     | 100.0     |
| 4                  | 66.9      | 12.3    | 11.6   | 0.0     | 3.1                    | 5.3    | 0.8     | 100.0     |
| 5                  | 59.0      | 17.4    | 12.3   | 0.0     | 4.2                    | 5.9    | 1.1     | 100.0     |
| 6                  | 71.6      | 13.2    | 8.0    | 0.7     | 1.9                    | 4.0    | 0.6     | 100.0     |
| 7                  | 76.9      | 10.9    | 5.9    | 0.0     | 0.0                    | 6.3    | 0.0     | 100.0     |
| 8                  | 63.2      | 14.5    | 12.4   | 0.0     | 3.2                    | 6.7    | 0.0     | 100.0     |
| Total              | 82.4      | 7.9     | 4.1    | 0.3     | 1.0                    | 3.8    | 0.5     | 100.0     |
| Column percentages |           |         |        |         |                        |        |         |           |
| 1                  | 81.7      | 83.1    | 75.4   | 77.5    | 76.5                   | 78.9   | 77.6    | 81.3      |
| 2                  | 17.4      | 15.0    | 22.2   | 20.3    | 21.0                   | 19.8   | 20.9    | 17.5      |
| 3                  | 0.2       | 0.4     | 0.6    | 0.5     | 0.6                    | 0.3    | 0.5     | 0.2       |
| 4                  | 0.1       | 0.1     | 0.2    | 0.0     | 0.2                    | 0.1    | 0.1     | 0.1       |
| 5                  | 0.0       | 0.1     | 0.2    | 0.0     | 0.2                    | 0.1    | 0.1     | 0.1       |
| 6                  | 0.6       | 1.2     | 1.4    | 1.7     | 1.4                    | 0.7    | 0.8     | 0.7       |
| 7                  | 0.0       | 0.0     | 0.0    | 0.0     | 0.0                    | 0.0    | 0.0     | 0.0       |
| 8                  | 0.0       | 0.0     | 0.1    | 0.0     | 0.1                    | 0.0    | 0.0     | 0.0       |
| Total              | 100.0     | 100.0   | 100.0  | 100.0   | 100.0                  | 100.0  | 100.0   | 100.0     |

Note: The table includes successful linked records.



Supplementary Table 7.3: Linkage personal demographics service to hospital episode statistics by linkage step and region (all pairs)

| Linkage step       | London  | South East | South West | West Midlands | North West | North East | Yorkshire and The Humber | East Midlands | East of England | Wales | Missing | Total     |
|--------------------|---------|------------|------------|---------------|------------|------------|--------------------------|---------------|-----------------|-------|---------|-----------|
| Records (n)        |         |            |            |               |            |            |                          |               |                 |       |         |           |
| 1                  | 278,298 | 315,432    | 196,505    | 233,888       | 297,522    | 104,861    | 213,681                  | 175,180       | 225,551         | 193   | 97,435  | 2,138,546 |
| 2                  | 11,609  | 5,149      | 2,934      | 5,004         | 6,838      | 1,861      | 4,449                    | 2,893         | 3,406           | 0     | 2,700   | 46,843    |
| 3                  | 2,673   | 1,173      | 740        | 965           | 1,435      | 386        | 863                      | 609           | 858             | 0     | 575     | 10,277    |
| 4                  | 340     | 64         | 35         | 130           | 121        | 28         | 90                       | 33            | 62              | 0     | 57      | 960       |
| 5                  | 6,599   | 1,976      | 901        | 2,489         | 3,503      | 831        | 2,374                    | 1,205         | 1,421           | 0     | 1,572   | 22,871    |
| 6                  | 1,766   | 876        | 531        | 930           | 1,336      | 352        | 701                      | 439           | 631             | 0     | 471     | 8,033     |
| 7                  | 5,770   | 4,424      | 2,726      | 3,658         | 5,611      | 1,367      | 2,728                    | 2,045         | 2,970           | 21    | 2,202   | 33,522    |
| 8                  | 871     | 267        | 151        | 266           | 464        | 78         | 214                      | 135           | 273             | 0     | 275     | 2,994     |
| Total              | 307,926 | 329,361    | 204,523    | 247,330       | 316,830    | 109,764    | 225,100                  | 182,539       | 235,172         | 221   | 105,280 | 2,264,046 |
| Row percentages    |         |            |            |               |            |            |                          |               |                 |       |         |           |
| 1                  | 13.0    | 14.7       | 9.2        | 10.9          | 13.9       | 4.9        | 10.0                     | 8.2           | 10.5            | 0.0   | 4.6     | 100.0     |
| 2                  | 24.8    | 11.0       | 6.3        | 10.7          | 14.6       | 4.0        | 9.5                      | 6.2           | 7.3             | 0.0   | 5.8     | 100.0     |
| 3                  | 26.0    | 11.4       | 7.2        | 9.4           | 14.0       | 3.8        | 8.4                      | 5.9           | 8.3             | 0.0   | 5.6     | 100.0     |
| 4                  | 35.4    | 6.7        | 3.6        | 13.5          | 12.6       | 2.9        | 9.4                      | 3.4           | 6.5             | 0.0   | 5.9     | 100.0     |
| 5                  | 28.9    | 8.6        | 3.9        | 10.9          | 15.3       | 3.6        | 10.4                     | 5.3           | 6.2             | 0.0   | 6.9     | 100.0     |
| 6                  | 22.0    | 10.9       | 6.6        | 11.6          | 16.6       | 4.4        | 8.7                      | 5.5           | 7.9             | 0.0   | 5.9     | 100.0     |
| 7                  | 17.2    | 13.2       | 8.1        | 10.9          | 16.7       | 4.1        | 8.1                      | 6.1           | 8.9             | 0.1   | 6.6     | 100.0     |
| 8                  | 29.1    | 8.9        | 5.0        | 8.9           | 15.5       | 2.6        | 7.1                      | 4.5           | 9.1             | 0.0   | 9.2     | 100.0     |
| Total              | 13.6    | 14.5       | 9.0        | 10.9          | 14.0       | 4.8        | 9.9                      | 8.1           | 10.4            | 0.0   | 4.7     | 100.0     |
| Column percentages |         |            |            |               |            |            |                          |               |                 |       |         |           |
| 1                  | 90.4    | 95.8       | 96.1       | 94.6          | 93.9       | 95.5       | 94.9                     | 96.0          | 95.9            | 87.3  | 92.5    | 94.5      |
| 2                  | 3.8     | 1.6        | 1.4        | 2.0           | 2.2        | 1.7        | 2.0                      | 1.6           | 1.4             | 0.0   | 2.6     | 2.1       |
| 3                  | 0.9     | 0.4        | 0.4        | 0.4           | 0.5        | 0.4        | 0.4                      | 0.3           | 0.4             | 0.0   | 0.5     | 0.5       |
| 4                  | 0.1     | 0.0        | 0.0        | 0.1           | 0.0        | 0.0        | 0.0                      | 0.0           | 0.0             | 0.0   | 0.1     | 0.0       |
| 5                  | 2.1     | 0.6        | 0.4        | 1.0           | 1.1        | 0.8        | 1.1                      | 0.7           | 0.6             | 0.0   | 1.5     | 1.0       |
| 6                  | 0.6     | 0.3        | 0.3        | 0.4           | 0.4        | 0.3        | 0.3                      | 0.2           | 0.3             | 0.0   | 0.4     | 0.4       |
| 7                  | 1.9     | 1.3        | 1.3        | 1.5           | 1.8        | 1.2        | 1.2                      | 1.1           | 1.3             | 9.5   | 2.1     | 1.5       |
| 8                  | 0.3     | 0.1        | 0.1        | 0.1           | 0.1        | 0.1        | 0.1                      | 0.1           | 0.1             | 0.0   | 0.3     | 0.1       |
| Total              | 100.0   | 100.0      | 100.0      | 100.0         | 100.0      | 100.0      | 100.0                    | 100.0         | 100.0           | 100.0 | 100.0   | 100.0     |

Note: The table includes successful linked records.

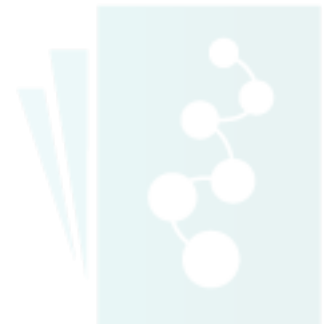

## Supplementary Appendix 7. Linking rates

Supplementary Table 8.1: Linking rate by region 2011 pupil's residence (first recorded) and cohort

|                          | Cohort 1990/91  |               |         | Cohort 1996/97  |               |         | Cohort 1999/00  |               |         | Cohort 2004/05  |               |         |
|--------------------------|-----------------|---------------|---------|-----------------|---------------|---------|-----------------|---------------|---------|-----------------|---------------|---------|
|                          | Unlinked to HES | Linked to HES | Total   | Unlinked to HES | Linked to HES | Total   | Unlinked to HES | Linked to HES | Total   | Unlinked to HES | Linked to HES | Total   |
| Records (n)              |                 |               |         |                 |               |         |                 |               |         |                 |               |         |
| London                   | 7,708           | 67,898        | 75,606  | 6,205           | 71,463        | 77,668  | 4,214           | 70,706        | 74,920  | 1,552           | 83,385        | 84,937  |
| South East               | 7,985           | 81,697        | 89,682  | 5,942           | 75,315        | 81,257  | 3,848           | 73,988        | 77,836  | 1,324           | 83,462        | 84,786  |
| South West               | 4,212           | 51,970        | 56,182  | 3,014           | 50,234        | 53,248  | 1,344           | 45,550        | 46,894  | 487             | 49,822        | 50,309  |
| West Midlands            | 4,906           | 62,935        | 67,841  | 3,371           | 59,909        | 63,280  | 2,233           | 54,985        | 57,218  | 735             | 60,099        | 60,834  |
| North West               | 6,194           | 83,206        | 89,400  | 3,623           | 77,676        | 81,299  | 2,008           | 70,358        | 72,366  | 953             | 75,962        | 76,915  |
| North East               | 1,563           | 29,287        | 30,850  | 1,019           | 27,323        | 28,342  | 571             | 24,419        | 24,990  | 187             | 25,898        | 26,085  |
| Yorkshire and The Humber | 3,872           | 57,455        | 61,327  | 2,886           | 54,467        | 57,353  | 1,481           | 49,579        | 51,060  | 652             | 56,059        | 56,711  |
| East Midlands            | 3,533           | 47,048        | 50,581  | 2,757           | 42,119        | 44,876  | 1,756           | 40,828        | 42,584  | 669             | 45,069        | 45,738  |
| East of England          | 5,526           | 59,620        | 65,146  | 4,500           | 54,325        | 58,825  | 3,085           | 52,101        | 55,186  | 1,010           | 57,331        | 58,341  |
| Wales                    | 28              | 38            | 66      | 0               | 45            | 45      | 0               | 64            | 64      | 0               | 69            | 69      |
| Missing                  | 2,314           | 23,777        | 26,091  | 1,808           | 22,741        | 24,549  | 1,304           | 23,645        | 24,949  | 673             | 30,692        | 31,365  |
| Total                    | 47,841          | 564,931       | 612,772 | 35,125          | 535,617       | 570,742 | 21,844          | 506,223       | 528,067 | 8,242           | 567,848       | 576,090 |
| Linkage rate (%)         |                 |               |         |                 |               |         |                 |               |         |                 |               |         |
| London                   | 10.2            | 89.8          | 100.0   | 8.0             | 92.0          | 100.0   | 5.6             | 94.4          | 100.0   | 1.8             | 98.2          | 100.0   |
| South East               | 8.9             | 91.1          | 100.0   | 7.3             | 92.7          | 100.0   | 4.9             | 95.1          | 100.0   | 1.6             | 98.4          | 100.0   |
| South West               | 7.5             | 92.5          | 100.0   | 5.7             | 94.3          | 100.0   | 2.9             | 97.1          | 100.0   | 1.0             | 99.0          | 100.0   |
| West Midlands            | 7.2             | 92.8          | 100.0   | 5.3             | 94.7          | 100.0   | 3.9             | 96.1          | 100.0   | 1.2             | 98.8          | 100.0   |
| North West               | 6.9             | 93.1          | 100.0   | 4.5             | 95.5          | 100.0   | 2.8             | 97.2          | 100.0   | 1.2             | 98.8          | 100.0   |
| North East               | 5.1             | 94.9          | 100.0   | 3.6             | 96.4          | 100.0   | 2.3             | 97.7          | 100.0   | 0.7             | 99.3          | 100.0   |
| Yorkshire and The Humber | 6.3             | 93.7          | 100.0   | 5.0             | 95.0          | 100.0   | 2.9             | 97.1          | 100.0   | 1.2             | 98.9          | 100.0   |
| East Midlands            | 7.0             | 93.0          | 100.0   | 6.1             | 93.9          | 100.0   | 4.1             | 95.9          | 100.0   | 1.5             | 98.5          | 100.0   |
| East of England          | 8.5             | 91.5          | 100.0   | 7.7             | 92.4          | 100.0   | 5.6             | 94.4          | 100.0   | 1.7             | 98.3          | 100.0   |
| Wales                    | 42.4            | 57.6          | 100.0   | 0.0             | 100.0         | 100.0   | 0.0             | 100.0         | 100.0   | 0.0             | 100.0         | 100.0   |
| Missing                  | 8.9             | 91.1          | 100.0   | 7.4             | 92.6          | 100.0   | 5.2             | 94.8          | 100.0   | 2.2             | 97.9          | 100.0   |
| Total                    | 7.8             | 92.2          | 100.0   | 6.2             | 93.9          | 100.0   | 4.1             | 95.9          | 100.0   | 1.4             | 98.6          | 100.0   |

Notes: HES = hospital episode statistics.

Supplementary Table 8.2: Linking rate by ethnic group and cohort

|                        | Cohort 1990/91  |               |         | Cohort 1996/97  |               |         | Cohort 1999/00  |               |         | Cohort 2004/05  |               |         |
|------------------------|-----------------|---------------|---------|-----------------|---------------|---------|-----------------|---------------|---------|-----------------|---------------|---------|
|                        | Unlinked to HES | Linked to HES | Total   | Unlinked to HES | Linked to HES | Total   | Unlinked to HES | Linked to HES | Total   | Unlinked to HES | Linked to HES | Total   |
| Records (n)            |                 |               |         |                 |               |         |                 |               |         |                 |               |         |
| White                  | 27,620          | 487,698       | 515,318 | 24,325          | 452,995       | 477,320 | 15,464          | 414,538       | 430,002 | 5,081           | 437,566       | 442,647 |
| Asian                  | 2,535           | 32,946        | 35,481  | 2,572           | 37,555        | 40,127  | 2,548           | 42,910        | 45,458  | 1,188           | 57,524        | 58,712  |
| Black                  | 1,500           | 16,967        | 18,467  | 1,416           | 19,154        | 20,570  | 1,697           | 21,416        | 23,113  | 679             | 31,483        | 32,162  |
| Chinese                | 276             | 1,379         | 1,655   | 211             | 1,437         | 1,648   | 170             | 1,527         | 1,697   | 88              | 2,034         | 2,122   |
| Any other ethnic group | 496             | 3,610         | 4,106   | 621             | 3,935         | 4,556   | 689             | 5,110         | 5,799   | 482             | 8,341         | 8,823   |
| Mixed                  | 832             | 13,775        | 14,607  | 1,272           | 19,244        | 20,516  | 1,157           | 20,098        | 21,255  | 559             | 29,699        | 30,258  |
| Missing                | 14,582          | 8,556         | 23,138  | 4,715           | 1,290         | 6,005   | 127             | 616           | 743     | 168             | 1,198         | 1,366   |
| Total                  | 47,841          | 564,931       | 612,772 | 35,132          | 535,610       | 570,742 | 21,852          | 506,215       | 528,067 | 8,245           | 567,845       | 576,090 |
| Linkage rate (%)       |                 |               |         |                 |               |         |                 |               |         |                 |               |         |
| White                  | 5.36            | 94.64         | 100.0   | 5.1             | 94.9          | 100.0   | 3.6             | 96.4          | 100.0   | 1.15            | 98.85         | 100.0   |
| Asian                  | 7.14            | 92.86         | 100.0   | 6.41            | 93.59         | 100.0   | 5.61            | 94.39         | 100.0   | 2.02            | 97.98         | 100.0   |
| Black                  | 8.12            | 91.88         | 100.0   | 6.88            | 93.12         | 100.0   | 7.34            | 92.66         | 100.0   | 2.11            | 97.89         | 100.0   |
| Chinese                | 16.68           | 83.32         | 100.0   | 12.8            | 87.2          | 100.0   | 10.02           | 89.98         | 100.0   | 4.15            | 95.85         | 100.0   |
| Any other ethnic group | 12.08           | 87.92         | 100.0   | 13.63           | 86.37         | 100.0   | 11.88           | 88.12         | 100.0   | 5.46            | 94.54         | 100.0   |
| Mixed                  | 5.7             | 94.3          | 100.0   | 6.2             | 93.8          | 100.0   | 5.44            | 94.56         | 100.0   | 1.85            | 98.15         | 100.0   |
| Missing                | 63.02           | 36.98         | 100.0   | 78.52           | 21.48         | 100.0   | 17.09           | 82.91         | 100.0   | 12.3            | 87.7          | 100.0   |
| Total                  | 7.81            | 92.19         | 100.0   | 6.16            | 93.84         | 100.0   | 4.14            | 95.86         | 100.0   | 1.43            | 98.57         | 100.0   |

Notes: HES = hospital episode statistics.

Supplementary Table 8.3: Linking rate by sex and cohort

|                  | Cohort 1990/91  |               |         | Cohort 1996/97  |               |         | Cohort 1999/00  |               |         | Cohort 2004/05  |               |         |
|------------------|-----------------|---------------|---------|-----------------|---------------|---------|-----------------|---------------|---------|-----------------|---------------|---------|
|                  | Unlinked to HES | Linked to HES | Total   | Unlinked to HES | Linked to HES | Total   | Unlinked to HES | Linked to HES | Total   | Unlinked to HES | Linked to HES | Total   |
| Records (N)      |                 |               |         |                 |               |         |                 |               |         |                 |               |         |
| Male             | 27,272          | 285,220       | 312,492 | 16,935          | 274,966       | 291,901 | 9,586           | 260,667       | 270,253 | 3,550           | 291,516       | 295,066 |
| Female           | 20,512          | 279,156       | 299,668 | 18,182          | 260,603       | 278,785 | 12,244          | 245,342       | 257,586 | 4,692           | 276,293       | 280,985 |
| Missing          | 57              | 555           | 612     | 15              | 41            | 56      | 22              | 206           | 228     | 0               | 39            | 39      |
| Total            | 47,841          | 564,931       | 612,772 | 35,132          | 535,610       | 570,742 | 21,852          | 506,215       | 528,067 | 8,242           | 567,848       | 576,090 |
| Linkage rate (%) |                 |               |         |                 |               |         |                 |               |         |                 |               |         |
| Male             | 8.7             | 91.3          | 100.0   | 5.8             | 94.2          | 100.0   | 3.6             | 96.5          | 100.0   | 1.2             | 98.8          | 100.0   |
| Female           | 6.8             | 93.2          | 100.0   | 6.5             | 93.5          | 100.0   | 4.8             | 95.3          | 100.0   | 1.7             | 98.3          | 100.0   |
| Missing          | 9.3             | 90.7          | 100.0   | 26.8            | 73.2          | 100.0   | 9.7             | 90.4          | 100.0   | 0.0             | 100.0         | 100.0   |
| Total            | 7.8             | 92.2          | 100.0   | 6.2             | 93.8          | 100.0   | 4.1             | 95.9          | 100.0   | 1.4             | 98.6          | 100.0   |

Notes: HES = hospital episode statistics.

Supplementary Table 8.4: Linking rate by IDACI deciles and cohort

|                  | Cohort 1990/91  |               |         | Cohort 1996/97  |               |         | Cohort 1999/00  |               |         | Cohort 2004/05  |               |         |
|------------------|-----------------|---------------|---------|-----------------|---------------|---------|-----------------|---------------|---------|-----------------|---------------|---------|
|                  | Unlinked to HES | Linked to HES | Total   | Unlinked to HES | Linked to HES | Total   | Unlinked to HES | Linked to HES | Total   | Unlinked to HES | Linked to HES | Total   |
| Records (N)      |                 |               |         |                 |               |         |                 |               |         |                 |               |         |
| 1 (deprived)     | 7,297           | 54,289        | 61,586  | 4,853           | 50,469        | 55,322  | 2,836           | 49,585        | 52,421  | 885             | 53,317        | 54,202  |
| 2                | 5,994           | 55,564        | 61,558  | 4,232           | 51,065        | 55,297  | 2,458           | 49,348        | 51,806  | 831             | 53,505        | 54,336  |
| 3                | 5,406           | 56,104        | 61,510  | 3,800           | 51,603        | 55,403  | 2,227           | 48,998        | 51,225  | 826             | 53,995        | 54,821  |
| 4                | 4,930           | 56,541        | 61,471  | 3,724           | 51,655        | 55,379  | 2,226           | 49,025        | 51,251  | 736             | 54,019        | 54,755  |
| 5                | 4,598           | 56,538        | 61,136  | 3,430           | 52,267        | 55,697  | 2,113           | 49,321        | 51,434  | 794             | 55,367        | 56,161  |
| 6                | 4,250           | 56,842        | 61,092  | 3,288           | 52,386        | 55,674  | 2,033           | 49,838        | 51,871  | 809             | 56,375        | 57,184  |
| 7                | 3,842           | 56,777        | 60,619  | 2,919           | 53,228        | 56,147  | 1,944           | 50,336        | 52,280  | 819             | 57,531        | 58,350  |
| 8                | 3,677           | 56,026        | 59,703  | 2,897           | 54,166        | 57,063  | 2,042           | 51,136        | 53,178  | 860             | 58,609        | 59,469  |
| 9                | 3,502           | 54,751        | 58,253  | 2,828           | 55,644        | 58,472  | 1,932           | 52,691        | 54,623  | 838             | 60,814        | 61,652  |
| 10 (affluent)    | 3,623           | 54,132        | 57,755  | 2,684           | 56,199        | 58,883  | 1,905           | 53,689        | 55,594  | 795             | 62,207        | 63,002  |
| Missing          | 722             | 7,367         | 8,089   | 477             | 6,928         | 7,405   | 136             | 2,248         | 2,384   | 52              | 2,106         | 2,158   |
| Total            | 47,841          | 564,931       | 612,772 | 35,132          | 535,610       | 570,742 | 21,852          | 506,215       | 528,067 | 8,245           | 567,845       | 576,090 |
| Linkage rate (%) |                 |               |         |                 |               |         |                 |               |         |                 |               |         |
| 1 (deprived)     | 11.9            | 88.2          | 100.0   | 8.8             | 91.2          | 100.0   | 5.4             | 94.6          | 100.0   | 1.6             | 98.4          | 100.0   |
| 2                | 9.7             | 90.3          | 100.0   | 7.7             | 92.4          | 100.0   | 4.7             | 95.3          | 100.0   | 1.5             | 98.5          | 100.0   |
| 3                | 8.8             | 91.2          | 100.0   | 6.9             | 93.1          | 100.0   | 4.4             | 95.7          | 100.0   | 1.5             | 98.5          | 100.0   |
| 4                | 8.0             | 92.0          | 100.0   | 6.7             | 93.3          | 100.0   | 4.3             | 95.7          | 100.0   | 1.3             | 98.7          | 100.0   |
| 5                | 7.5             | 92.5          | 100.0   | 6.2             | 93.8          | 100.0   | 4.1             | 95.9          | 100.0   | 1.4             | 98.6          | 100.0   |
| 6                | 7.0             | 93.0          | 100.0   | 5.9             | 94.1          | 100.0   | 3.9             | 96.1          | 100.0   | 1.4             | 98.6          | 100.0   |
| 7                | 6.3             | 93.7          | 100.0   | 5.2             | 94.8          | 100.0   | 3.7             | 96.3          | 100.0   | 1.4             | 98.6          | 100.0   |
| 8                | 6.2             | 93.8          | 100.0   | 5.1             | 94.9          | 100.0   | 3.8             | 96.2          | 100.0   | 1.5             | 98.6          | 100.0   |
| 9                | 6.0             | 94.0          | 100.0   | 4.8             | 95.2          | 100.0   | 3.5             | 96.5          | 100.0   | 1.4             | 98.6          | 100.0   |
| 10 (affluent)    | 6.3             | 93.7          | 100.0   | 4.6             | 95.4          | 100.0   | 3.4             | 96.6          | 100.0   | 1.3             | 98.7          | 100.0   |
| Missing          | 8.9             | 91.1          | 100.0   | 6.4             | 93.6          | 100.0   | 5.7             | 94.3          | 100.0   | 2.4             | 97.6          | 100.0   |
| Total            | 7.8             | 92.2          | 100.0   | 6.2             | 93.8          | 100.0   | 4.1             | 95.9          | 100.0   | 1.4             | 98.6          | 100.0   |

Notes: HES = hospital episode statistics; IDACI = income deprivation affecting children index.



Supplementary Table 8.5: Linking rate by sex, ethnicity and cohort

|                         | Cohort 1990/91  |               |         | Cohort 1996/97  |               |         | Cohort 1999/00  |               |         | Cohort 2004/05  |               |         |
|-------------------------|-----------------|---------------|---------|-----------------|---------------|---------|-----------------|---------------|---------|-----------------|---------------|---------|
|                         | Unlinked to HES | Linked to HES | Total   | Unlinked to HES | Linked to HES | Total   | Unlinked to HES | Linked to HES | Total   | Unlinked to HES | Linked to HES | Total   |
| Records (n)             |                 |               |         |                 |               |         |                 |               |         |                 |               |         |
| Male-White              | 16,520          | 246,476       | 262,996 | 11,709          | 232,580       | 244,289 | 6,848           | 213,370       | 220,218 | 2,236           | 224,778       | 227,014 |
| Male-Asian              | 1,438           | 16,594        | 18,032  | 1,121           | 19,386        | 20,507  | 1,081           | 22,153        | 23,234  | 495             | 29,559        | 30,054  |
| Male-Black              | 915             | 8,392         | 9,307   | 689             | 9,784         | 10,473  | 686             | 11,121        | 11,807  | 268             | 16,111        | 16,379  |
| Male-Chinese            | 148             | 686           | 834     | 93              | 726           | 819     | 88              | 764           | 852     | 34              | 1,000         | 1,034   |
| Male-Any other ethnic   | 287             | 1,902         | 2,189   | 309             | 2,036         | 2,345   | 323             | 2,636         | 2,959   | 201             | 4,222         | 4,423   |
| Male-Mixed              | 488             | 6,794         | 7,282   | 589             | 9,789         | 10,378  | 510             | 10,296        | 10,806  | 223             | 15,227        | 15,450  |
| Female-White            | 11,100          | 241,222       | 252,322 | 12,616          | 220,415       | 233,031 | 8,610           | 201,077       | 209,687 | 2,844           | 212,782       | 215,626 |
| Female-Asian            | 1,097           | 16,352        | 17,449  | 1,451           | 18,169        | 19,620  | 1,465           | 20,712        | 22,177  | 692             | 27,959        | 28,651  |
| Female-Black            | 585             | 8,575         | 9,160   | 727             | 9,370         | 10,097  | 1,009           | 10,267        | 11,276  | 411             | 15,366        | 15,777  |
| Female-Chinese          | 128             | 693           | 821     | 118             | 711           | 829     | 82              | 761           | 843     | 54              | 1,034         | 1,088   |
| Female-Any other ethnic | 209             | 1,708         | 1,917   | 312             | 1,899         | 2,211   | 364             | 2,463         | 2,827   | 280             | 4,116         | 4,396   |
| Female-Mixed            | 344             | 6,981         | 7,325   | 683             | 9,455         | 10,138  | 645             | 9,795         | 10,440  | 336             | 14,469        | 14,805  |
| Total                   | 33,259          | 556,375       | 589,634 | 30,417          | 534,320       | 564,737 | 21,711          | 505,415       | 527,126 | 8,074           | 566,623       | 574,697 |
| Linkage rate (%)        |                 |               |         |                 |               |         |                 |               |         |                 |               |         |
| Male-White              | 6.3             | 93.7          | 100.0   | 4.8             | 95.2          | 100.0   | 3.1             | 96.9          | 100.0   | 1.0             | 99.0          | 100.0   |
| Male-Asian              | 8.0             | 92.0          | 100.0   | 5.5             | 94.5          | 100.0   | 4.7             | 95.4          | 100.0   | 1.7             | 98.4          | 100.0   |
| Male-Black              | 9.8             | 90.2          | 100.0   | 6.6             | 93.4          | 100.0   | 5.8             | 94.2          | 100.0   | 1.6             | 98.4          | 100.0   |
| Male-Chinese            | 17.8            | 82.3          | 100.0   | 11.4            | 88.6          | 100.0   | 10.3            | 89.7          | 100.0   | 3.3             | 96.7          | 100.0   |
| Male-Any other ethnic   | 13.1            | 86.9          | 100.0   | 13.2            | 86.8          | 100.0   | 10.9            | 89.1          | 100.0   | 4.5             | 95.5          | 100.0   |
| Male-Mixed              | 6.7             | 93.3          | 100.0   | 5.7             | 94.3          | 100.0   | 4.7             | 95.3          | 100.0   | 1.4             | 98.6          | 100.0   |
| Female-White            | 4.4             | 95.6          | 100.0   | 5.4             | 94.6          | 100.0   | 4.1             | 95.9          | 100.0   | 1.3             | 98.7          | 100.0   |
| Female-Asian            | 6.3             | 93.7          | 100.0   | 7.4             | 92.6          | 100.0   | 6.6             | 93.4          | 100.0   | 2.4             | 97.6          | 100.0   |
| Female-Black            | 6.4             | 93.6          | 100.0   | 7.2             | 92.8          | 100.0   | 9.0             | 91.1          | 100.0   | 2.6             | 97.4          | 100.0   |
| Female-Chinese          | 15.6            | 84.4          | 100.0   | 14.2            | 85.8          | 100.0   | 9.7             | 90.3          | 100.0   | 5.0             | 95.0          | 100.0   |
| Female-Any other ethnic | 10.9            | 89.1          | 100.0   | 14.1            | 85.9          | 100.0   | 12.9            | 87.1          | 100.0   | 6.4             | 93.6          | 100.0   |
| Female-Mixed            | 4.7             | 95.3          | 100.0   | 6.7             | 93.3          | 100.0   | 6.2             | 93.8          | 100.0   | 2.3             | 97.7          | 100.0   |
| Total                   | 5.6             | 94.4          | 100.0   | 5.4             | 94.6          | 100.0   | 4.1             | 95.9          | 100.0   | 1.4             | 98.6          | 100.0   |

Notes: HES = hospital episode statistics. Cohort totals may differ from previous tables because the table excludes observations with missing Ethnicity.

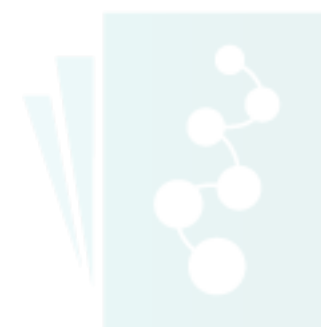

**Supplementary Appendix 8. Standardized differences and P-values**

Supplementary Table 9.1: Distribution of demographic variables in national pupil dataset by linking status, N = 613,732 pairs (national pupil dataset to hospital episode statistics). Cohort 1990/91

|                                                    | No link to HES |       | Linked to HES |       | Total   |       | P-value | Standardized difference |        |       |
|----------------------------------------------------|----------------|-------|---------------|-------|---------|-------|---------|-------------------------|--------|-------|
|                                                    | N              | (%)   | N             | (%)   | N       | (%)   |         |                         |        |       |
| Region 2011 pupil's residence (first recorded) NPD |                |       |               |       |         |       |         |                         |        |       |
| London                                             | 7,729          | 16.1  | 68,073        | 12.0  | 75,802  | 12.4  | <0.001  | 0.191                   |        |       |
| South East                                         | 8,000          | 16.7  | 81,806        | 14.5  | 89,806  | 14.6  |         |                         |        |       |
| South West                                         | 4,217          | 8.8   | 52,018        | 9.2   | 56,235  | 9.2   |         |                         |        |       |
| West Midlands                                      | 4,915          | 10.3  | 63,013        | 11.1  | 67,928  | 11.1  |         |                         |        |       |
| North West                                         | 6,200          | 12.9  | 83,376        | 14.7  | 89,576  | 14.6  |         |                         |        |       |
| North East                                         | 1,567          | 3.3   | 29,318        | 5.2   | 30,885  | 5.0   |         |                         |        |       |
| Yorkshire and The Humber                           | 3,885          | 8.1   | 57,539        | 10.2  | 61,424  | 10.0  |         |                         |        |       |
| East Midlands                                      | 3,535          | 7.4   | 47,096        | 8.3   | 50,631  | 8.2   |         |                         |        |       |
| East of England                                    | 5,541          | 11.6  | 59,686        | 10.5  | 65,227  | 10.6  |         |                         |        |       |
| Wales                                              | 28             | 0.1   | 38            | 0.0   | 66      | 0.0   |         |                         |        |       |
| Missing                                            | 2,317          | 4.8   | 23,835        | 4.2   | 26,152  | 4.3   |         |                         |        |       |
| Total                                              | 47,934         | 100.0 | 565,798       | 100.0 | 613,732 | 100.0 |         |                         |        |       |
| Ethnic group (NPD)                                 |                |       |               |       |         |       |         |                         |        |       |
| White                                              | 27,692         | 57.8  | 488,330       | 86.3  | 516,022 | 84.1  |         |                         | <0.001 | 0.160 |
| Asian                                              | 2,541          | 5.3   | 33,024        | 5.8   | 35,565  | 5.8   |         |                         |        |       |
| Black                                              | 1,507          | 3.1   | 17,047        | 3.0   | 18,554  | 3.0   |         |                         |        |       |
| Chinese                                            | 278            | 0.6   | 1,384         | 0.2   | 1,662   | 0.3   |         |                         |        |       |
| Any other ethnic group                             | 498            | 1.0   | 3,627         | 0.6   | 4,125   | 0.7   |         |                         |        |       |
| Mixed                                              | 834            | 1.7   | 13,808        | 2.4   | 14,642  | 2.4   |         |                         |        |       |
| Missing                                            | 14,584         | 30.4  | 8,578         | 1.5   | 23,162  | 3.8   |         |                         |        |       |
| Total                                              | 47,934         | 100.0 | 565,798       | 100.0 | 613,732 | 100.0 |         |                         |        |       |
| Sex (NPD)                                          |                |       |               |       |         |       |         |                         |        |       |
| Male                                               | 27,334         | 57.0  | 285,716       | 50.5  | 313,050 | 51.0  | <0.001  | 0.131                   |        |       |
| Female                                             | 20,543         | 42.9  | 279,520       | 49.4  | 300,063 | 48.9  |         |                         |        |       |
| Missing                                            | 57             | 0.1   | 562           | 0.1   | 619     | 0.1   |         |                         |        |       |
| Total                                              | 47,934         | 100.0 | 565,798       | 100.0 | 613,732 | 100.0 |         |                         |        |       |
| IDACI Deciles (first Census) NPD                   |                |       |               |       |         |       |         |                         |        |       |
| 1 (deprived)                                       | 7,306          | 15.2  | 54,336        | 9.6   | 61,642  | 10.0  | <0.001  | 0.242                   |        |       |
| 2                                                  | 6,001          | 12.5  | 55,606        | 9.8   | 61,607  | 10.0  |         |                         |        |       |
| 3                                                  | 5,414          | 11.3  | 56,149        | 9.9   | 61,563  | 10.0  |         |                         |        |       |
| 4                                                  | 4,941          | 10.3  | 56,600        | 10.0  | 61,541  | 10.0  |         |                         |        |       |
| 5                                                  | 4,611          | 9.6   | 56,620        | 10.0  | 61,231  | 10.0  |         |                         |        |       |
| 6                                                  | 4,255          | 8.9   | 56,927        | 10.1  | 61,182  | 10.0  |         |                         |        |       |
| 7                                                  | 3,854          | 8.0   | 56,891        | 10.1  | 60,745  | 9.9   |         |                         |        |       |
| 8                                                  | 3,685          | 7.7   | 56,122        | 9.9   | 59,807  | 9.7   |         |                         |        |       |
| 9                                                  | 3,514          | 7.3   | 54,875        | 9.7   | 58,389  | 9.5   |         |                         |        |       |
| 10 (affluent)                                      | 3,630          | 7.6   | 54,286        | 9.6   | 57,916  | 9.4   |         |                         |        |       |
| Missing                                            | 723            | 1.5   | 7,386         | 1.3   | 8,109   | 1.3   |         |                         |        |       |
| Total                                              | 47,934         | 100.0 | 565,798       | 100.0 | 613,732 | 100.0 |         |                         |        |       |
| Age at start academic year (first recorded) NPD    |                |       |               |       |         |       |         |                         |        |       |
| 9 or less                                          | 1,083          | 2.3   | 7,618         | 1.3   | 8,701   | 1.4   | <0.001  | 0.106                   |        |       |
| 10                                                 | 45,766         | 95.5  | 551,317       | 97.4  | 597,083 | 97.3  |         |                         |        |       |
| 11 or more                                         | 1,028          | 2.1   | 6,301         | 1.1   | 7,329   | 1.2   |         |                         |        |       |
| Missing                                            | 57             | 0.1   | 562           | 0.1   | 619     | 0.1   |         |                         |        |       |
| Total                                              | 47,934         | 100.0 | 565,798       | 100.0 | 613,732 | 100.0 |         |                         |        |       |

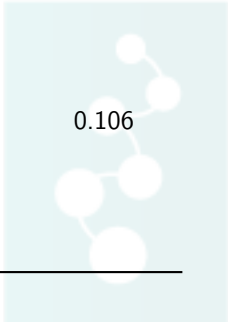

Supplementary Table 9.1: Continued

|                                                                                                      | No link to HES |       | Linked to HES |       | Total   |       | P-value | Standardized difference |
|------------------------------------------------------------------------------------------------------|----------------|-------|---------------|-------|---------|-------|---------|-------------------------|
|                                                                                                      | N              | (%)   | N             | (%)   | N       | (%)   |         |                         |
| Persistent Absence Y10                                                                               |                |       |               |       |         |       |         |                         |
| No                                                                                                   | 23695          | 49.4  | 416921        | 73.7  | 440616  | 71.8  | <0.001  | 0.277                   |
| Yes                                                                                                  | 3477           | 7.3   | 127053        | 22.5  | 130530  | 21.3  |         |                         |
| Missing                                                                                              | 20,762         | 43.3  | 21,824        | 3.9   | 42,586  | 6.9   |         |                         |
| Total                                                                                                | 47,934         | 100.0 | 565,798       | 100.0 | 613,732 | 100.0 |         |                         |
| Persistent Absence Y11                                                                               |                |       |               |       |         |       |         |                         |
| No                                                                                                   | 21914          | 45.7  | 395806        | 70.0  | 417720  | 68.1  | <0.001  | 0.255                   |
| Yes                                                                                                  | 4247           | 8.9   | 143616        | 25.4  | 147863  | 24.1  |         |                         |
| Missing                                                                                              | 21773          | 45.4  | 26376         | 4.7   | 48149   | 7.8   |         |                         |
| Total                                                                                                | 47,934         | 100.0 | 565,798       | 100.0 | 613,732 | 100.0 |         |                         |
| SEN: Special Education Need                                                                          |                |       |               |       |         |       |         |                         |
| No                                                                                                   | 40222          | 83.9  | 399408        | 70.6  | 439630  | 71.6  | <0.001  | 0.323                   |
| Yes                                                                                                  | 7655           | 16.0  | 165828        | 29.3  | 173483  | 28.3  |         |                         |
| Missing                                                                                              | 57             | 0.1   | 562           | 0.1   | 619     | 0.1   |         |                         |
| Total                                                                                                | 47,934         | 100.0 | 565,798       | 100.0 | 613,732 | 100.0 |         |                         |
| AAP/S: School Action or Early Years Action, School Action Plus or Early Years Action and SEN support |                |       |               |       |         |       |         |                         |
| No                                                                                                   | 41471          | 86.5  | 421231        | 74.4  | 462702  | 75.4  | <0.001  | 0.310                   |
| Yes                                                                                                  | 6406           | 13.4  | 144005        | 25.5  | 150411  | 24.5  |         |                         |
| Missing                                                                                              | 57             | 0.1   | 562           | 0.1   | 619     | 0.1   |         |                         |
| Total                                                                                                | 47934          | 100.0 | 565,798       | 100.0 | 613,732 | 100.0 |         |                         |
| S/EHCP: Statement and Education, health and care plan                                                |                |       |               |       |         |       |         |                         |
| No                                                                                                   | 46484          | 97.0  | 538775        | 95.2  | 585259  | 95.4  | <0.001  | 0.093                   |
| Yes                                                                                                  | 1393           | 2.9   | 26461         | 4.7   | 27854   | 4.5   |         |                         |
| Missing                                                                                              | 57             | 0.1   | 562           | 0.1   | 619     | 0.1   |         |                         |
| Total                                                                                                | 47934          | 100.0 | 565,798       | 100.0 | 613,732 | 100.0 |         |                         |

Notes: NPD = national pupil dataset; HES = hospital episode statistics; IDACI = income deprivation affecting children index.



Supplementary Table 9.2: Distribution of demographic variables in national pupil dataset by linking status, N = 571,918 pairs (national pupil dataset to hospital episode statistics). Cohort 1996/97

|                                                    | No link to HES |       | Linked to HES |       | Total   |       | P-value | Standard difference |
|----------------------------------------------------|----------------|-------|---------------|-------|---------|-------|---------|---------------------|
|                                                    | n              | (%)   | n             | (%)   | n       | (%)   |         |                     |
| Region 2011 pupil's residence (first recorded) NPD |                |       |               |       |         |       |         |                     |
| London                                             | 6,243          | 17.7  | 71,652        | 13.4  | 77,895  | 13.6  | <0.001  | 0.247               |
| South East                                         | 5,961          | 16.9  | 75,452        | 14.1  | 81,413  | 14.2  |         |                     |
| South West                                         | 3,021          | 8.6   | 50,302        | 9.4   | 53,323  | 9.3   |         |                     |
| West Midlands                                      | 3,392          | 9.6   | 60,027        | 11.2  | 63,419  | 11.1  |         |                     |
| North West                                         | 3,630          | 10.3  | 77,805        | 14.5  | 81,435  | 14.2  |         |                     |
| North East                                         | 1,025          | 2.9   | 27,374        | 5.1   | 28,399  | 5.0   |         |                     |
| Yorkshire and The Humber                           | 2,908          | 8.2   | 54,564        | 10.2  | 57,472  | 10.0  |         |                     |
| East Midlands                                      | 2,769          | 7.8   | 42,187        | 7.9   | 44,956  | 7.9   |         |                     |
| East of England                                    | 4,525          | 12.8  | 54,424        | 10.1  | 58,949  | 10.3  |         |                     |
| Wales                                              | 0              | 0.0   | 45            | 0.0   | 45      | 0.0   |         |                     |
| Missing                                            | 1,818          | 5.2   | 22,794        | 4.2   | 24,612  | 4.3   |         |                     |
| Total                                              | 35,292         | 100.0 | 536,626       | 100.0 | 571,918 | 100.0 |         |                     |
| Ethnic group (NPD)                                 |                |       |               |       |         |       |         |                     |
| White                                              | 24,452         | 69.3  | 453,764       | 84.6  | 478,216 | 83.6  | <0.001  | 0.159               |
| Asian                                              | 2,584          | 7.3   | 37,654        | 7.0   | 40,238  | 7.0   |         |                     |
| Black                                              | 1,429          | 4.0   | 19,228        | 3.6   | 20,657  | 3.6   |         |                     |
| Chinese                                            | 213            | 0.6   | 1,439         | 0.3   | 1,652   | 0.3   |         |                     |
| Any other ethnic group                             | 626            | 1.8   | 3,951         | 0.7   | 4,577   | 0.8   |         |                     |
| Mixed                                              | 1,278          | 3.6   | 19,286        | 3.6   | 20,564  | 3.6   |         |                     |
| Missing                                            | 4,717          | 13.4  | 1,297         | 0.2   | 6,014   | 1.1   |         |                     |
| Total                                              | 35,299         | 100.0 | 536,619       | 100.0 | 571,918 | 100.0 |         |                     |
| Sex (NPD)                                          |                |       |               |       |         |       |         |                     |
| Male                                               | 17,014         | 48.2  | 275,479       | 51.3  | 292,493 | 51.1  | <0.001  | 0.062               |
| Female                                             | 18,268         | 51.8  | 261,094       | 48.7  | 279,362 | 48.8  |         |                     |
| Missing                                            | 17             | 0.0   | 46            | 0.0   | 63      | 0.0   |         |                     |
| Total                                              | 35,299         | 100.0 | 536,619       | 100.0 | 571,918 | 100.0 |         |                     |
| IDACI Deciles (first Census) NPD                   |                |       |               |       |         |       |         |                     |
| 1 (deprived)                                       | 4,866          | 13.8  | 50,540        | 9.4   | 55,406  | 9.7   | <0.001  | 0.218               |
| 2                                                  | 4,247          | 12.0  | 51,132        | 9.5   | 55,379  | 9.7   |         |                     |
| 3                                                  | 3,811          | 10.8  | 51,662        | 9.6   | 55,473  | 9.7   |         |                     |
| 4                                                  | 3,738          | 10.6  | 51,725        | 9.6   | 55,463  | 9.7   |         |                     |
| 5                                                  | 3,444          | 9.8   | 52,336        | 9.8   | 55,780  | 9.8   |         |                     |
| 6                                                  | 3,310          | 9.4   | 52,503        | 9.8   | 55,813  | 9.8   |         |                     |
| 7                                                  | 2,936          | 8.3   | 53,336        | 9.9   | 56,272  | 9.8   |         |                     |
| 8                                                  | 2,914          | 8.3   | 54,281        | 10.1  | 57,195  | 10.0  |         |                     |
| 9                                                  | 2,851          | 8.1   | 55,791        | 10.4  | 58,642  | 10.3  |         |                     |
| 10 (affluent)                                      | 2,701          | 7.7   | 56,355        | 10.5  | 59,056  | 10.3  |         |                     |
| Missing                                            | 481            | 1.4   | 6,958         | 1.3   | 7,439   | 1.3   |         |                     |
| Total                                              | 35,299         | 100.0 | 536,619       | 100.0 | 571,918 | 100.0 |         |                     |
| Age at start academic year (first recorded) NPD    |                |       |               |       |         |       |         |                     |
| 4 or less                                          | 406            | 1.2   | 4,281         | 0.8   | 4,687   | 0.8   | <0.001  | 0.149               |
| 5                                                  | 32,406         | 91.8  | 512,223       | 95.5  | 544,629 | 95.2  |         |                     |
| 6 or more                                          | 2,470          | 7.0   | 20,069        | 3.7   | 22,539  | 3.9   |         |                     |
| Missing                                            | 17             | 0.0   | 46            | 0.0   | 63      | 0.0   |         |                     |
| Total                                              | 35,299         | 100.0 | 536,619       | 100.0 | 571,918 | 100.0 |         |                     |
| Persistent Absence Y5                              |                |       |               |       |         |       |         |                     |
| No                                                 | 21,882         | 62.0  | 466,085       | 86.9  | 487,967 | 85.3  | <0.001  | 0.174               |
| Yes                                                | 1,381          | 3.9   | 55,794        | 10.4  | 57,175  | 10.0  |         |                     |
| Missing                                            | 12,036         | 34.1  | 14,740        | 2.7   | 26,776  | 4.7   |         |                     |
| Total                                              | 35,299         | 100.0 | 536,619       | 100.0 | 571,918 | 100.0 |         |                     |

Supplementary Table 9.2: Continued

|                                                                                                      | No link to HES |       | Linked to HES |       | Total   |       | P-value | Standard difference |
|------------------------------------------------------------------------------------------------------|----------------|-------|---------------|-------|---------|-------|---------|---------------------|
|                                                                                                      | n              | (%)   | n             | (%)   | n       | (%)   |         |                     |
| Persistent Absence Y6                                                                                |                |       |               |       |         |       |         |                     |
| No                                                                                                   | 21,214         | 60.1  | 466,146       | 86.9  | 487,360 | 85.2  | <0.001  | 0.178               |
| Yes                                                                                                  | 1,184          | 3.4   | 51,790        | 9.7   | 52,974  | 9.3   |         |                     |
| Missing                                                                                              | 12,901         | 36.5  | 18,683        | 3.5   | 31,584  | 5.5   |         |                     |
| Total                                                                                                | 35,299         | 100.0 | 536,619       | 100.0 | 571,918 | 100.0 |         |                     |
| Persistent Absence Y7                                                                                |                |       |               |       |         |       |         |                     |
| No                                                                                                   | 20,027         | 56.7  | 439,725       | 81.9  | 459,752 | 80.4  | <0.001  | 0.243               |
| Yes                                                                                                  | 1,309          | 3.7   | 67,155        | 12.5  | 68,464  | 12.0  |         |                     |
| Missing                                                                                              | 13,963         | 39.6  | 29,739        | 5.5   | 43,702  | 7.6   |         |                     |
| Total                                                                                                | 35,299         | 100.0 | 536,619       | 100.0 | 571,918 | 100.0 |         |                     |
| Persistent Absence Y8                                                                                |                |       |               |       |         |       |         |                     |
| No                                                                                                   | 19,656         | 55.7  | 431,203       | 80.4  | 450,859 | 78.8  | <0.001  | 0.260               |
| Yes                                                                                                  | 1,420          | 4.0   | 74,341        | 13.9  | 75,761  | 13.2  |         |                     |
| Missing                                                                                              | 14,223         | 40.3  | 31,075        | 5.8   | 45,298  | 7.9   |         |                     |
| Total                                                                                                | 35,299         | 100.0 | 536,619       | 100.0 | 571,918 | 100.0 |         |                     |
| Persistent Absence Y9                                                                                |                |       |               |       |         |       |         |                     |
| No                                                                                                   | 19,644         | 55.7  | 430,882       | 80.3  | 450,526 | 78.8  | <0.001  | 0.280               |
| Yes                                                                                                  | 1,270          | 3.6   | 73,033        | 13.6  | 74,303  | 13.0  |         |                     |
| Missing                                                                                              | 14,385         | 40.8  | 32,704        | 6.1   | 47,089  | 8.2   |         |                     |
| Total                                                                                                | 35,299         | 100.0 | 536,619       | 100.0 | 571,918 | 100.0 |         |                     |
| Persistent Absence Y10                                                                               |                |       |               |       |         |       |         |                     |
| No                                                                                                   | 19,880         | 56.3  | 440,437       | 82.1  | 460,317 | 80.5  | <0.001  | 0.269               |
| Yes                                                                                                  | 971            | 2.8   | 60,133        | 11.2  | 61,104  | 10.7  |         |                     |
| Missing                                                                                              | 14,448         | 40.9  | 36,049        | 6.7   | 50,497  | 8.8   |         |                     |
| Total                                                                                                | 35,299         | 100.0 | 536,619       | 100.0 | 571,918 | 100.0 |         |                     |
| Persistent Absence Y11                                                                               |                |       |               |       |         |       |         |                     |
| No                                                                                                   | 17,968         | 50.9  | 414,077       | 77.2  | 432,045 | 75.5  | <0.001  | 0.264               |
| Yes                                                                                                  | 1,053          | 3.0   | 62,465        | 11.6  | 63,518  | 11.1  |         |                     |
| Missing                                                                                              | 16,278         | 46.1  | 60,077        | 11.2  | 76,355  | 13.4  |         |                     |
| Total                                                                                                | 35,299         | 100.0 | 536,619       | 100.0 | 571,918 | 100.0 |         |                     |
| SEN: Special Education Need                                                                          |                |       |               |       |         |       |         |                     |
| No                                                                                                   | 27,164         | 77.0  | 306,131       | 57.0  | 333,295 | 58.3  | <0.001  | 0.435               |
| Yes                                                                                                  | 8,118          | 23.0  | 230,442       | 42.9  | 238,560 | 41.7  |         |                     |
| Missing                                                                                              | 17             | 0.0   | 46            | 0.0   | 63      | 0.0   |         |                     |
| Total                                                                                                | 35,299         | 100.0 | 536,619       | 100.0 | 571,918 | 100.0 |         |                     |
| AAP/S: School Action or Early Years Action, School Action Plus or Early Years Action and SEN support |                |       |               |       |         |       |         |                     |
| No                                                                                                   | 27,448         | 77.8  | 315,908       | 58.9  | 343,356 | 60.0  | <0.001  | 0.416               |
| Yes                                                                                                  | 7,834          | 22.2  | 220,665       | 41.1  | 228,499 | 40.0  |         |                     |
| Missing                                                                                              | 17             | 0.0   | 46            | 0.0   | 63      | 0.0   |         |                     |
| Total                                                                                                | 35,299         | 100.0 | 536,619       | 100.0 | 571,918 | 100.0 |         |                     |
| S/EHCP: Statement and Education, health and care plan                                                |                |       |               |       |         |       |         |                     |
| No                                                                                                   | 34,810         | 98.6  | 512,580       | 95.5  | 547,390 | 95.7  | <0.001  | 0.188               |
| Yes                                                                                                  | 472            | 1.3   | 23,993        | 4.5   | 24,465  | 4.3   |         |                     |
| Missing                                                                                              | 17             | 0.0   | 46            | 0.0   | 63      | 0.0   |         |                     |
| Total                                                                                                | 35,299         | 100.0 | 536,619       | 100.0 | 571,918 | 100.0 |         |                     |

Notes: NPD = national pupil dataset; HES = hospital episode statistics; IDACI = income deprivation affecting children index.

Supplementary Table 9.3: Distribution of demographic variables in national pupil dataset by linking status, N = 529,910 pairs (national pupil dataset to hospital episode statistics). Cohort 1999/00

|                                                    | No linked to HES |       | Linked to HES |       | Total   |       | P-value | Standard difference |
|----------------------------------------------------|------------------|-------|---------------|-------|---------|-------|---------|---------------------|
|                                                    | n                | (%)   | n             | (%)   | n       | (%)   |         |                     |
| Region 2011 pupil's residence (first recorded) NPD |                  |       |               |       |         |       |         |                     |
| London                                             | 4,303            | 19.4  | 71,001        | 14.0  | 75,304  | 14.2  | <0.001  | 0.3105              |
| South East                                         | 3,881            | 17.5  | 74,189        | 14.6  | 78,070  | 14.7  |         |                     |
| South West                                         | 1,364            | 6.1   | 45,672        | 9.0   | 47,036  | 8.9   |         |                     |
| West Midlands                                      | 2,274            | 10.3  | 55,174        | 10.9  | 57,448  | 10.8  |         |                     |
| North West                                         | 2,036            | 9.2   | 70,533        | 13.9  | 72,569  | 13.7  |         |                     |
| North East                                         | 585              | 2.6   | 24,497        | 4.8   | 25,082  | 4.7   |         |                     |
| Yorkshire and The Humber                           | 1,502            | 6.8   | 49,701        | 9.8   | 51,203  | 9.7   |         |                     |
| East Midlands                                      | 1,786            | 8.1   | 40,944        | 8.1   | 42,730  | 8.1   |         |                     |
| East of England                                    | 3,119            | 14.1  | 52,238        | 10.3  | 55,357  | 10.4  |         |                     |
| Wales                                              | 0                | 0.0   | 64            | 0.0   | 64      | 0.0   |         |                     |
| Missing                                            | 1,327            | 6.0   | 23,720        | 4.7   | 25,047  | 4.7   |         |                     |
| Total                                              | 22,177           | 100.0 | 507,733       | 100.0 | 529,910 | 100.0 |         |                     |
| Ethnic group (NPD)                                 |                  |       |               |       |         |       |         |                     |
| White                                              | 15,692           | 70.7  | 415,660       | 81.9  | 431,352 | 81.4  | <0.001  | 0.2809              |
| Asian                                              | 2,581            | 11.6  | 43,061        | 8.5   | 45,642  | 8.6   |         |                     |
| Black                                              | 1,735            | 7.8   | 21,528        | 4.2   | 23,263  | 4.4   |         |                     |
| Chinese                                            | 172              | 0.8   | 1,530         | 0.3   | 1,702   | 0.3   |         |                     |
| Any other ethnic group                             | 700              | 3.2   | 5,146         | 1.0   | 5,846   | 1.1   |         |                     |
| Mixed                                              | 1,178            | 5.3   | 20,177        | 4.0   | 21,355  | 4.0   |         |                     |
| Missing                                            | 127              | 0.6   | 623           | 0.1   | 750     | 0.1   |         |                     |
| Total                                              | 22,185           | 100.0 | 507,725       | 100.0 | 529,910 | 100.0 |         |                     |
| Sex (NPD)                                          |                  |       |               |       |         |       |         |                     |
| Male                                               | 9,717            | 43.8  | 261,398       | 51.5  | 271,115 | 51.2  | <0.001  | 0.1526              |
| Female                                             | 12,445           | 56.1  | 246,116       | 48.5  | 258,561 | 48.8  |         |                     |
| Missing                                            | 23               | 0.1   | 211           | 0.0   | 234     | 0.0   |         |                     |
| Total                                              | 22,185           | 100.0 | 507,725       | 100.0 | 529,910 | 100.0 |         |                     |
| IDACI Deciles (first Census) NPD                   |                  |       |               |       |         |       |         |                     |
| 1 (deprived)                                       | 2,863            | 12.9  | 49,733        | 9.8   | 52,596  | 9.9   | <0.001  | 0.1417              |
| 2                                                  | 2,487            | 11.2  | 49,457        | 9.7   | 51,944  | 9.8   |         |                     |
| 3                                                  | 2,257            | 10.2  | 49,130        | 9.7   | 51,387  | 9.7   |         |                     |
| 4                                                  | 2,263            | 10.2  | 49,153        | 9.7   | 51,416  | 9.7   |         |                     |
| 5                                                  | 2,139            | 9.6   | 49,450        | 9.7   | 51,589  | 9.7   |         |                     |
| 6                                                  | 2,056            | 9.3   | 49,965        | 9.8   | 52,021  | 9.8   |         |                     |
| 7                                                  | 1,980            | 8.9   | 50,467        | 9.9   | 52,447  | 9.9   |         |                     |
| 8                                                  | 2,077            | 9.4   | 51,321        | 10.1  | 53,398  | 10.1  |         |                     |
| 9                                                  | 1,972            | 8.9   | 52,884        | 10.4  | 54,856  | 10.4  |         |                     |
| 10 (affluent)                                      | 1,953            | 8.8   | 53,904        | 10.6  | 55,857  | 10.5  |         |                     |
| Missing                                            | 138              | 0.6   | 2,261         | 0.4   | 2,399   | 0.5   |         |                     |
| Total                                              | 22,185           | 100.0 | 507,725       | 100.0 | 529,910 | 100.0 |         |                     |
| Age at start academic year (first recorded) NPD    |                  |       |               |       |         |       |         |                     |
| 4 or less                                          | 152              | 0.7   | 2,409         | 0.5   | 2,561   | 0.5   | <0.001  | 0.0674              |
| 5                                                  | 21,775           | 98.2  | 502,514       | 99.0  | 524,289 | 98.9  |         |                     |
| 6 or more                                          | 249              | 1.1   | 2,775         | 0.5   | 3,024   | 0.6   |         |                     |
| Missing                                            | 9                | 0.0   | 27            | 0.0   | 36      | 0.0   |         |                     |
| Total                                              | 22,185           | 100.0 | 507,725       | 100.0 | 529,910 | 100.0 |         |                     |

Supplementary Table 9.3: Continued

|                        | No linked to HES |       | Linked to HES |       | Total   |       | P-value | Standard difference |
|------------------------|------------------|-------|---------------|-------|---------|-------|---------|---------------------|
|                        | n                | (%)   | n             | (%)   | n       | (%)   |         |                     |
| Persistent Absence Y2  |                  |       |               |       |         |       |         |                     |
| No                     | 17,347           | 78.2  | 445,430       | 87.7  | 462,777 | 87.3  | <0.001  | 0.1075              |
| Yes                    | 1,440            | 6.5   | 53,770        | 10.6  | 55,210  | 10.4  |         |                     |
| Missing                | 3398             | 15.3  | 8525          | 1.7   | 11923   | 2.3   |         |                     |
| Total                  | 22185            | 100.0 | 507725        | 100.0 | 529910  | 100.0 |         |                     |
| Persistent Absence Y3  |                  |       |               |       |         |       |         |                     |
| No                     | 16513            | 74.4  | 444782        | 87.6  | 461295  | 87.1  | <0.001  | 0.1307              |
| Yes                    | 1127             | 5.1   | 49193         | 9.7   | 50320   | 9.5   |         |                     |
| Missing                | 4,545            | 20.5  | 13,750        | 2.7   | 18,295  | 3.5   |         |                     |
| Total                  | 22,185           | 100.0 | 507,725       | 100.0 | 529,910 | 100.0 |         |                     |
| Persistent Absence Y4  |                  |       |               |       |         |       |         |                     |
| No                     | 15952            | 71.9  | 441778        | 87.0  | 457730  | 86.4  | <0.001  | 0.1709              |
| Yes                    | 910              | 4.1   | 48320         | 9.5   | 49230   | 9.3   |         |                     |
| Missing                | 5323             | 24.0  | 17627         | 3.5   | 22950   | 4.3   |         |                     |
| Total                  | 22185            | 100.0 | 507725        | 100.0 | 529910  | 100.0 |         |                     |
| Persistent Absence Y5  |                  |       |               |       |         |       |         |                     |
| No                     | 15,562           | 70.1  | 441,354       | 86.9  | 456,916 | 86.2  | <0.001  | 0.1645              |
| Yes                    | 859              | 3.9   | 46,038        | 9.1   | 46,897  | 8.8   |         |                     |
| Missing                | 5,764            | 26.0  | 20,333        | 4.0   | 26,097  | 4.9   |         |                     |
| Total                  | 22,185           | 100.0 | 507,725       | 100.0 | 529,910 | 100.0 |         |                     |
| Persistent Absence Y6  |                  |       |               |       |         |       |         |                     |
| No                     | 15,505           | 69.9  | 445,377       | 87.7  | 460,882 | 87.0  | <0.001  | 0.1885              |
| Yes                    | 599              | 2.7   | 39,445        | 7.8   | 40,044  | 7.6   |         |                     |
| Missing                | 6,081            | 27.4  | 22,903        | 4.5   | 28,984  | 5.5   |         |                     |
| Total                  | 22,185           | 100.0 | 507,725       | 100.0 | 529,910 | 100.0 |         |                     |
| Persistent Absence Y7  |                  |       |               |       |         |       |         |                     |
| No                     | 15,034           | 67.8  | 436,743       | 86.0  | 451,777 | 85.3  | <0.001  | 0.2105              |
| Yes                    | 512              | 2.3   | 38,455        | 7.6   | 38,967  | 7.4   |         |                     |
| Missing                | 6,639            | 29.9  | 32,527        | 6.4   | 39,166  | 7.4   |         |                     |
| Total                  | 22,185           | 100.0 | 507,725       | 100.0 | 529,910 | 100.0 |         |                     |
| Persistent Absence Y8  |                  |       |               |       |         |       |         |                     |
| No                     | 14,782           | 66.6  | 426,385       | 84.0  | 441,167 | 83.3  | <0.001  | 0.2316              |
| Yes                    | 639              | 2.9   | 47,234        | 9.3   | 47,873  | 9.0   |         |                     |
| Missing                | 6,764            | 30.5  | 34,106        | 6.7   | 40,870  | 7.7   |         |                     |
| Total                  | 22,185           | 100.0 | 507,725       | 100.0 | 529,910 | 100.0 |         |                     |
| Persistent Absence Y9  |                  |       |               |       |         |       |         |                     |
| No                     | 14,917           | 67.2  | 432,105       | 85.1  | 447,022 | 84.4  | <0.001  | 0.2515              |
| Yes                    | 436              | 2.0   | 40,401        | 8.0   | 40,837  | 7.7   |         |                     |
| Missing                | 6,832            | 30.8  | 35,219        | 6.9   | 42,051  | 7.9   |         |                     |
| Total                  | 22,185           | 100.0 | 507,725       | 100.0 | 529,910 | 100.0 |         |                     |
| Persistent Absence Y10 |                  |       |               |       |         |       |         |                     |
| No                     | 14,799           | 66.7  | 424,866       | 83.7  | 439,665 | 83.0  | <0.001  | 0.2715              |
| Yes                    | 488              | 2.2   | 45,726        | 9.0   | 46,214  | 8.7   |         |                     |
| Missing                | 6,898            | 31.1  | 37,133        | 7.3   | 44,031  | 8.3   |         |                     |
| Total                  | 22,185           | 100.0 | 507,725       | 100.0 | 529,910 | 100.0 |         |                     |

Supplementary Table 9.3: Continued

|                                                                                                             | No linked to HES |       | Linked to HES |       | Total   |       | P-value | Standard difference |
|-------------------------------------------------------------------------------------------------------------|------------------|-------|---------------|-------|---------|-------|---------|---------------------|
|                                                                                                             | n                | (%)   | n             | (%)   | n       | (%)   |         |                     |
| <b>Persistent Absence Y11</b>                                                                               |                  |       |               |       |         |       |         |                     |
| No                                                                                                          | 14,475           | 65.2  | 416,671       | 82.1  | 431,146 | 81.4  | <0.001  | 0.2353              |
| Yes                                                                                                         | 621              | 2.8   | 46,459        | 9.2   | 47,080  | 8.9   |         |                     |
| Missing                                                                                                     | 7,089            | 32.0  | 44,595        | 8.8   | 51,684  | 9.8   |         |                     |
| Total                                                                                                       | 22,185           | 100.0 | 507,725       | 100.0 | 529,910 | 100.0 |         |                     |
| <b>SEN: Special Education Need</b>                                                                          |                  |       |               |       |         |       |         |                     |
| No                                                                                                          | 16,438           | 74.1  | 291,701       | 57.5  | 308,139 | 58.1  | <0.001  | 0.3612              |
| Yes                                                                                                         | 5,739            | 25.9  | 215,997       | 42.5  | 221,736 | 41.8  |         |                     |
| Missing                                                                                                     | 0                | 0.0   | 35            | 0.0   | 35      | 0.0   |         |                     |
| Total                                                                                                       | 22,177           | 100.0 | 507,733       | 100.0 | 529,910 | 100.0 |         |                     |
| <b>AAP/S: School Action or Early Years Action, School Action Plus or Early Years Action and SEN support</b> |                  |       |               |       |         |       |         |                     |
| No                                                                                                          | 16,495           | 74.4  | 298,569       | 58.8  | 315,064 | 59.5  | <0.001  | 0.3390              |
| Yes                                                                                                         | 5,682            | 25.6  | 209,129       | 41.2  | 214,811 | 40.5  |         |                     |
| Missing                                                                                                     | 0                | 0.0   | 35            | 0.0   | 35      | 0.0   |         |                     |
| Total                                                                                                       | 22,177           | 100.0 | 507,733       | 100.0 | 529,910 | 100.0 |         |                     |
| <b>S/EHCP: Statement and Education, health and care plan</b>                                                |                  |       |               |       |         |       |         |                     |
| No                                                                                                          | 21,980           | 99.1  | 484,288       | 95.4  | 506,268 | 95.5  | <0.001  | 0.2324              |
| Yes                                                                                                         | 197              | 0.9   | 23,410        | 4.6   | 23,607  | 4.5   |         |                     |
| Missing                                                                                                     | 0                | 0.0   | 35            | 0.0   | 35      | 0.0   |         |                     |
| Total                                                                                                       | 22,177           | 100.0 | 507,733       | 100.0 | 529,910 | 100.0 |         |                     |

Notes: NPD = national pupil dataset; HES = hospital episode statistics; IDACI = income deprivation affecting children index.





Supplementary Table 9.4: Distribution of demographic variables in national pupil dataset by linking status, N = 578,809 pairs (national pupil dataset to hospital episode statistics). Cohort 2004/05

|                                                    | No link to HES |       | Linked to HES |       | Total   |       | P-value | Standard difference |
|----------------------------------------------------|----------------|-------|---------------|-------|---------|-------|---------|---------------------|
|                                                    | n              | (%)   | n             | (%)   | n       | (%)   |         |                     |
| Region 2011 pupil's residence (first recorded) NPD |                |       |               |       |         |       |         |                     |
| London                                             | 1,590          | 18.8  | 83,817        | 14.7  | 85,407  | 14.8  | 0.000   | 0.237               |
| South East                                         | 1,353          | 16.0  | 83,748        | 14.7  | 85,101  | 14.7  |         |                     |
| South West                                         | 504            | 5.9   | 49,993        | 8.8   | 50,497  | 8.7   |         |                     |
| West Midlands                                      | 759            | 9.0   | 60,358        | 10.6  | 61,117  | 10.6  |         |                     |
| North West                                         | 986            | 11.6  | 76,373        | 13.4  | 77,359  | 13.4  |         |                     |
| North East                                         | 197            | 2.3   | 26,007        | 4.6   | 26,204  | 4.5   |         |                     |
| Yorkshire and The Humber                           | 671            | 7.9   | 56,330        | 9.9   | 57,001  | 9.8   |         |                     |
| East Midlands                                      | 689            | 8.1   | 45,255        | 7.9   | 45,944  | 7.9   |         |                     |
| East of England                                    | 1,040          | 12.3  | 57,545        | 10.1  | 58,585  | 10.1  |         |                     |
| Wales                                              | 0              | 0.0   | 69            | 0.0   | 69      | 0.0   |         |                     |
| Missing                                            | 685            | 8.1   | 30,840        | 5.4   | 31,525  | 5.4   |         |                     |
| Total                                              | 8,474          | 100.0 | 570,335       | 100.0 | 578,809 | 100.0 |         |                     |
| Ethnic group (NPD)                                 |                |       |               |       |         |       |         |                     |
| White                                              | 5,255          | 62.0  | 439,397       | 77.0  | 444,652 | 76.8  | 0.000   | 0.358               |
| Asian                                              | 1,207          | 14.2  | 57,790        | 10.1  | 58,997  | 10.2  |         |                     |
| Black                                              | 696            | 8.2   | 31,656        | 5.6   | 32,352  | 5.6   |         |                     |
| Chinese                                            | 89             | 1.0   | 2,038         | 0.4   | 2,127   | 0.4   |         |                     |
| Any other ethnic group                             | 486            | 5.7   | 8,375         | 1.5   | 8,861   | 1.5   |         |                     |
| Mixed                                              | 575            | 6.8   | 29,871        | 5.2   | 30,446  | 5.3   |         |                     |
| Missing                                            | 169            | 2.0   | 1,205         | 0.2   | 1,374   | 0.2   |         |                     |
| Total                                              | 8,477          | 100.0 | 570,332       | 100.0 | 578,809 | 100.0 |         |                     |
| Sex (NPD)                                          |                |       |               |       |         |       |         |                     |
| Male                                               | 3,660          | 43.2  | 292,784       | 51.3  | 296,444 | 51.2  | 0.000   | 0.166               |
| Female                                             | 4,814          | 56.8  | 277,508       | 48.7  | 282,322 | 48.8  |         |                     |
| Missing                                            | 0              | 0.0   | 43            | 0.0   | 43      | 0.0   |         |                     |
| Total                                              | 8,474          | 100.0 | 570,335       | 100.0 | 578,809 | 100.0 |         |                     |
| IDACI Deciles (first Census) NPD                   |                |       |               |       |         |       |         |                     |
| 1 (deprived)                                       | 909            | 10.7  | 53,590        | 9.4   | 54,499  | 9.4   | 0.000   | 0.070               |
| 2                                                  | 855            | 10.1  | 53,748        | 9.4   | 54,603  | 9.4   |         |                     |
| 3                                                  | 849            | 10.0  | 54,246        | 9.5   | 55,095  | 9.5   |         |                     |
| 4                                                  | 750            | 8.8   | 54,250        | 9.5   | 55,000  | 9.5   |         |                     |
| 5                                                  | 812            | 9.6   | 55,571        | 9.7   | 56,383  | 9.7   |         |                     |
| 6                                                  | 840            | 9.9   | 56,601        | 9.9   | 57,441  | 9.9   |         |                     |
| 7                                                  | 844            | 10.0  | 57,776        | 10.1  | 58,620  | 10.1  |         |                     |
| 8                                                  | 885            | 10.4  | 58,854        | 10.3  | 59,739  | 10.3  |         |                     |
| 9                                                  | 858            | 10.1  | 61,048        | 10.7  | 61,906  | 10.7  |         |                     |
| 10 (affluent)                                      | 821            | 9.7   | 62,514        | 11.0  | 63,335  | 10.9  |         |                     |
| Missing                                            | 54             | 0.6   | 2,134         | 0.4   | 2,188   | 0.4   |         |                     |
| Total                                              | 8,477          | 100.0 | 570,332       | 100.0 | 578,809 | 100.0 |         |                     |
| Age at start academic year (first recorded) NPD    |                |       |               |       |         |       |         |                     |
| 4 or less                                          | 34             | 0.4   | 1,078         | 0.2   | 1,112   | 0.2   | 0.000   | 0.083               |
| 5                                                  | 8,382          | 98.9  | 568,198       | 99.6  | 576,580 | 99.6  |         |                     |
| 6 or more                                          | 61             | 0.7   | 1,042         | 0.2   | 1,103   | 0.2   |         |                     |
| Missing                                            | 0              | 0.0   | 14            | 0.0   | 14      | 0.0   |         |                     |
| Total                                              | 8,477          | 100.0 | 570,332       | 100.0 | 578,809 | 100.0 |         |                     |

Supplementary Table 9.4: Continued

|                             | No link to HES |       | Linked to HES |       | Total   |       | P-value | Standard difference |
|-----------------------------|----------------|-------|---------------|-------|---------|-------|---------|---------------------|
|                             | n              | (%)   | n             | (%)   | n       | (%)   |         |                     |
| Persistent Absence Y1       |                |       |               |       |         |       |         |                     |
| No                          | 6,560          | 77.4  | 499,976       | 87.7  | 506,536 | 87.5  | 0.000   | 0.034               |
| Yes                         | 766            | 9.0   | 64,769        | 11.4  | 65,535  | 11.3  |         |                     |
| Missing                     | 1151           | 13.6  | 5587          | 1.0   | 6738    | 1.2   |         |                     |
| Total                       | 8477           | 100.0 | 570332        | 100.0 | 578809  | 100.0 |         |                     |
| Persistent Absence Y2       |                |       |               |       |         |       |         |                     |
| No                          | 6,288          | 74.2  | 524,842       | 92.0  | 531,130 | 91.8  | 0.000   | 0.074               |
| Yes                         | 314            | 3.7   | 35,861        | 6.3   | 36,175  | 6.2   |         |                     |
| Missing                     | 1875           | 22.1  | 9629          | 1.7   | 11504   | 2.0   |         |                     |
| Total                       | 8477           | 100.0 | 570332        | 100.0 | 578809  | 100.0 |         |                     |
| Persistent Absence Y3       |                |       |               |       |         |       |         |                     |
| No                          | 5904           | 69.6  | 520032        | 91.2  | 525936  | 90.9  | 0.000   | 0.079               |
| Yes                         | 277            | 3.3   | 34753         | 6.1   | 35030   | 6.1   |         |                     |
| Missing                     | 2,296          | 27.1  | 15,547        | 2.7   | 17,843  | 3.1   |         |                     |
| Total                       | 8,477          | 100.0 | 570,332       | 100.0 | 578,809 | 100.0 |         |                     |
| Persistent Absence Y4       |                |       |               |       |         |       |         |                     |
| No                          | 5804           | 68.5  | 529210        | 92.8  | 535014  | 92.4  | 0.000   | 0.125               |
| Yes                         | 113            | 1.3   | 21646         | 3.8   | 21759   | 3.8   |         |                     |
| Missing                     | 2560           | 30.2  | 19476         | 3.4   | 22036   | 3.8   |         |                     |
| Total                       | 8477           | 100.0 | 570332        | 100.0 | 578809  | 100.0 |         |                     |
| Persistent Absence Y5       |                |       |               |       |         |       |         |                     |
| No                          | 5,666          | 66.8  | 521,853       | 91.5  | 527,519 | 91.1  | 0.000   | 0.171               |
| Yes                         | 95             | 1.1   | 25,261        | 4.4   | 25,356  | 4.4   |         |                     |
| Missing                     | 2,716          | 32.0  | 23,218        | 4.1   | 25,934  | 4.5   |         |                     |
| Total                       | 8,477          | 100.0 | 570,332       | 100.0 | 578,809 | 100.0 |         |                     |
| Persistent Absence Y6       |                |       |               |       |         |       |         |                     |
| No                          | 5,575          | 65.8  | 521,192       | 91.4  | 526,767 | 91.0  | 0.000   | 0.143               |
| Yes                         | 97             | 1.1   | 21,989        | 3.9   | 22,086  | 3.8   |         |                     |
| Missing                     | 2,805          | 33.1  | 27,151        | 4.8   | 29,956  | 5.2   |         |                     |
| Total                       | 8,477          | 100.0 | 570,332       | 100.0 | 578,809 | 100.0 |         |                     |
| Persistent Absence Y7       |                |       |               |       |         |       |         |                     |
| No                          | 5,407          | 63.8  | 505,729       | 88.7  | 511,136 | 88.3  | 0.000   | 0.188               |
| Yes                         | 99             | 1.2   | 27,407        | 4.8   | 27,506  | 4.8   |         |                     |
| Missing                     | 2,971          | 35.0  | 37,196        | 6.5   | 40,167  | 6.9   |         |                     |
| Total                       | 8,477          | 100.0 | 570,332       | 100.0 | 578,809 | 100.0 |         |                     |
| Persistent Absence Y8       |                |       |               |       |         |       |         |                     |
| No                          | 5,341          | 63.0  | 494,149       | 86.6  | 499,490 | 86.3  | 0.000   | 0.201               |
| Yes                         | 145            | 1.7   | 36,519        | 6.4   | 36,664  | 6.3   |         |                     |
| Missing                     | 2,991          | 35.3  | 39,664        | 7.0   | 42,655  | 7.4   |         |                     |
| Total                       | 8,477          | 100.0 | 570,332       | 100.0 | 578,809 | 100.0 |         |                     |
| SEN: Special Education Need |                |       |               |       |         |       |         |                     |
| No                          | 6,626          | 78.2  | 372,191       | 65.3  | 378,817 | 65.4  | 0.000   | 0.306               |
| Yes                         | 1,851          | 21.8  | 198,127       | 34.7  | 199,978 | 34.5  |         |                     |
| Missing                     | 0              | 0.0   | 14            | 0.0   | 14      | 0.0   |         |                     |
| Total                       | 8,477          | 100.0 | 570,332       | 100.0 | 578,809 | 100.0 |         |                     |

Supplementary Table 9.4: Continued

|                                                                                                      | No link to HES |       | Linked to HES |       | Total   |       | P-value | Standard difference |
|------------------------------------------------------------------------------------------------------|----------------|-------|---------------|-------|---------|-------|---------|---------------------|
|                                                                                                      | n              | (%)   | n             | (%)   | n       | (%)   |         |                     |
| AAP/S: School Action or Early Years Action, School Action Plus or Early Years Action and SEN support |                |       |               |       |         |       |         |                     |
| No                                                                                                   | 6,643          | 78.4  | 379,274       | 66.5  | 385,917 | 66.7  | 0.000   | 0.284               |
| Yes                                                                                                  | 1,834          | 21.6  | 191,044       | 33.5  | 192,878 | 33.3  |         |                     |
| Missing                                                                                              | 0              | 0.0   | 14            | 0.0   | 14      | 0.0   |         |                     |
| Total                                                                                                | 8,477          | 100.0 | 570,332       | 100.0 | 578,809 | 100.0 |         |                     |
| S/EHCP: Statement and Education, health and care plan                                                |                |       |               |       |         |       |         |                     |
| No                                                                                                   | 8,412          | 99.2  | 548,057       | 96.1  | 556,469 | 96.1  | 0.000   | 0.218               |
| Yes                                                                                                  | 65             | 0.8   | 22,261        | 3.9   | 22,326  | 3.9   |         |                     |
| Missing                                                                                              | 0              | 0.0   | 14            | 0.0   | 14      | 0.0   |         |                     |
| Total                                                                                                | 8,477          | 100.0 | 570,332       | 100.0 | 578,809 | 100.0 |         |                     |

Notes: NPD = national pupil dataset; HES = hospital episode statistics; IDACI = income deprivation affecting children index.



**Supplementary Appendix 9. Linkage evaluation Logit models**

Supplementary Table 10: Odd Ratios (OR) and adjusted Odd Ratios (aOR) for linkage to HES by cohort

|                          | Cohort 1990/91   |               |                      |                 | Cohort 1996/97   |               |                      |                |
|--------------------------|------------------|---------------|----------------------|-----------------|------------------|---------------|----------------------|----------------|
|                          | (1)<br>Bivariate |               | (2)<br>Multivariable |                 | (3)<br>Bivariate |               | (4)<br>Multivariable |                |
|                          | OR               | Conf. Int.    | aOR                  | Conf. Int.      | OR               | Conf. Int.    | aOR                  | Conf. Int.     |
| <b>Ethnic group</b>      |                  |               |                      |                 |                  |               |                      |                |
| White                    | Ref              |               | Ref                  |                 | Ref              |               | Ref                  |                |
| Asian                    | 0.74             | [0.71,0.77]** | 0.69                 | [0.66,0.72]**   | 0.79             | [0.75,0.82]** | 0.69                 | [0.66,0.73]**  |
| Black                    | 0.64             | [0.61,0.68]** | 0.62                 | [0.59,0.66]**   | 0.73             | [0.69,0.77]** | 0.67                 | [0.63,0.71]**  |
| Chinese                  | 0.28             | [0.25,0.32]** | 0.29                 | [0.26,0.33]**   | 0.36             | [0.32,0.42]** | 0.38                 | [0.33,0.44]**  |
| Any other ethnic group   | 0.41             | [0.38,0.45]** | 0.42                 | [0.38,0.46]**   | 0.34             | [0.31,0.37]** | 0.32                 | [0.30,0.35]**  |
| Mixed                    | 0.94             | [0.87,1.01]   | 0.92                 | [0.85,0.98]*    | 0.81             | [0.77,0.86]** | 0.80                 | [0.75,0.85]**  |
| Missing                  | 0.03             | [0.03,0.03]** | 0.03                 | [0.03,0.03]**   | 0.01             | [0.01,0.02]** | 0.01                 | [0.01,0.02]**  |
| <b>Sex</b>               |                  |               |                      |                 |                  |               |                      |                |
| Male                     | Ref              |               | Ref                  |                 | Ref              |               | Ref                  |                |
| Female                   | 1.30             | [1.28,1.33]** | 1.35                 | [1.32,1.37]**   | 0.88             | [0.86,0.90]** | 0.87                 | [0.85,0.89]**  |
| Missing                  | 0.94             | [0.72,1.24]   | 22.77                | [17.02,30.47]** | 0.17             | [0.10,0.29]** | 10.21                | [5.77,18.07]** |
| <b>Region</b>            |                  |               |                      |                 |                  |               |                      |                |
| London                   | Ref              |               | Ref                  |                 | Ref              |               | Ref                  |                |
| South East               | 1.16             | [1.12,1.20]** | 1.31                 | [1.26,1.36]**   | 1.10             | [1.06,1.14]** | 1.12                 | [1.08,1.17]**  |
| South West               | 1.40             | [1.35,1.46]** | 1.34                 | [1.28,1.40]**   | 1.45             | [1.39,1.52]** | 1.38                 | [1.31,1.45]**  |
| West Midlands            | 1.46             | [1.40,1.51]** | 1.27                 | [1.22,1.33]**   | 1.54             | [1.48,1.61]** | 1.37                 | [1.30,1.43]**  |
| North West               | 1.53             | [1.47,1.58]** | 1.36                 | [1.30,1.41]**   | 1.87             | [1.79,1.95]** | 1.64                 | [1.57,1.72]**  |
| North East               | 2.12             | [2.01,2.25]** | 1.91                 | [1.80,2.04]**   | 2.33             | [2.18,2.49]** | 1.99                 | [1.85,2.14]**  |
| Yorkshire and The Humber | 1.68             | [1.62,1.75]** | 1.34                 | [1.28,1.40]**   | 1.64             | [1.56,1.71]** | 1.42                 | [1.35,1.49]**  |
| East Midlands            | 1.51             | [1.45,1.58]** | 1.28                 | [1.23,1.35]**   | 1.33             | [1.27,1.39]** | 1.22                 | [1.16,1.28]**  |
| East of England          | 1.22             | [1.18,1.27]** | 1.14                 | [1.09,1.19]**   | 1.05             | [1.01,1.09]*  | 1.00                 | [0.95,1.04]    |
| Wales                    | 0.15             | [0.09,0.25]** | 0.31                 | [0.16,0.59]**   | 0.47             | [0.21,1.06]   | 0.40                 | [0.17,0.93]*   |
| Missing                  | 1.17             | [1.11,1.23]** | 1.16                 | [1.10,1.23]**   | 1.09             | [1.03,1.15]** | 1.08                 | [1.01,1.14]*   |
| <b>IDACI Deciles</b>     |                  |               |                      |                 |                  |               |                      |                |
| 1 (deprived)             | 0.61             | [0.58,0.63]** | 0.67                 | [0.64,0.70]**   | 0.68             | [0.65,0.72]** | 0.71                 | [0.67,0.74]**  |
| 2                        | 0.76             | [0.72,0.79]** | 0.78                 | [0.74,0.81]**   | 0.79             | [0.76,0.83]** | 0.77                 | [0.73,0.81]**  |
| 3                        | 0.85             | [0.81,0.88]** | 0.86                 | [0.82,0.90]**   | 0.89             | [0.85,0.94]** | 0.87                 | [0.83,0.92]**  |
| 4                        | 0.93             | [0.89,0.97]** | 0.95                 | [0.90,0.99]*    | 0.91             | [0.87,0.96]** | 0.90                 | [0.85,0.94]**  |
| 5                        | Ref              |               | Ref                  |                 | Ref              |               | Ref                  |                |
| 6                        | 1.09             | [1.04,1.14]** | 1.11                 | [1.05,1.16]**   | 1.04             | [0.99,1.10]   | 1.05                 | [1.00,1.11]    |
| 7                        | 1.20             | [1.15,1.26]** | 1.26                 | [1.20,1.32]**   | 1.20             | [1.14,1.26]** | 1.23                 | [1.16,1.29]**  |
| 8                        | 1.24             | [1.19,1.30]** | 1.31                 | [1.25,1.38]**   | 1.23             | [1.17,1.29]** | 1.27                 | [1.20,1.34]**  |
| 9                        | 1.27             | [1.22,1.33]** | 1.31                 | [1.25,1.38]**   | 1.29             | [1.22,1.36]** | 1.37                 | [1.29,1.44]**  |
| 10 (affluent)            | 1.22             | [1.16,1.27]** | 1.27                 | [1.21,1.34]**   | 1.37             | [1.30,1.45]** | 1.52                 | [1.44,1.61]**  |
| Missing                  | 0.83             | [0.77,0.90]** | 0.95                 | [0.86,1.04]     | 0.95             | [0.86,1.05]   | 1.06                 | [0.95,1.18]    |
| Observations             |                  |               | 613,732              |                 |                  |               | 571,918              |                |
| Pseudo R-squared         |                  |               | 0.162                |                 |                  |               | 0.093                |                |

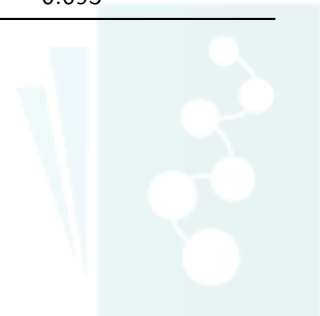

Supplementary Table 10: Continued

|                          | Cohort 1999/00   |               |                      |               | Cohort 2004/05   |               |                      |               |
|--------------------------|------------------|---------------|----------------------|---------------|------------------|---------------|----------------------|---------------|
|                          | (5)<br>Bivariate |               | (6)<br>Multivariable |               | (7)<br>Bivariate |               | (8)<br>Multivariable |               |
|                          | OR               | Conf. Int.    | aOR                  | Conf. Int.    | OR               | Conf. Int.    | aOR                  | Conf. Int.    |
| Ethnic group             |                  |               |                      |               |                  |               |                      |               |
| White                    | Ref              |               | Ref                  |               | Ref              |               | Ref                  |               |
| Asian                    | 0.63             | [0.60,0.66]** | 0.56                 | [0.54,0.59]** | 0.57             | [0.54,0.61]** | 0.51                 | [0.47,0.54]** |
| Black                    | 0.47             | [0.44,0.49]** | 0.43                 | [0.40,0.45]** | 0.54             | [0.50,0.59]** | 0.47                 | [0.43,0.51]** |
| Chinese                  | 0.34             | [0.29,0.39]** | 0.35                 | [0.30,0.41]** | 0.27             | [0.22,0.34]** | 0.27                 | [0.22,0.34]** |
| Any other ethnic group   | 0.28             | [0.26,0.30]** | 0.26                 | [0.24,0.28]** | 0.21             | [0.19,0.23]** | 0.18                 | [0.17,0.20]** |
| Mixed                    | 0.65             | [0.61,0.69]** | 0.64                 | [0.60,0.68]** | 0.62             | [0.57,0.68]** | 0.60                 | [0.55,0.66]** |
| Missing                  | 0.19             | [0.15,0.22]** | 0.21                 | [0.17,0.25]** | 0.09             | [0.07,0.10]** | 0.09                 | [0.07,0.10]** |
| Sex                      |                  |               |                      |               |                  |               |                      |               |
| Male                     | Ref              |               | Ref                  |               | Ref              |               | Ref                  |               |
| Female                   | 0.74             | [0.72,0.76]** | 0.73                 | [0.71,0.75]** | 0.72             | [0.69,0.75]** | 0.72                 | [0.69,0.75]** |
| Missing                  | 0.34             | [0.22,0.52]** | 0.61                 | [0.39,0.96]*  | 0.17             | [0.05,0.54]** | 1.00                 | [0.29,3.50]   |
| Region                   |                  |               |                      |               |                  |               |                      |               |
| London                   | Ref              |               | Ref                  |               | Ref              |               | Ref                  |               |
| South East               | 1.16             | [1.11,1.21]** | 1.00                 | [0.95,1.04]   | 1.17             | [1.09,1.26]** | 0.94                 | [0.87,1.02]   |
| South West               | 2.03             | [1.91,2.16]** | 1.62                 | [1.51,1.73]** | 1.88             | [1.70,2.08]** | 1.38                 | [1.24,1.54]** |
| West Midlands            | 1.47             | [1.40,1.55]** | 1.23                 | [1.16,1.30]** | 1.51             | [1.38,1.65]** | 1.21                 | [1.11,1.33]** |
| North West               | 2.10             | [1.99,2.22]** | 1.64                 | [1.55,1.74]** | 1.47             | [1.36,1.59]** | 1.09                 | [1.00,1.19]*  |
| North East               | 2.54             | [2.33,2.77]** | 1.82                 | [1.67,2.00]** | 2.50             | [2.16,2.91]** | 1.71                 | [1.47,1.99]** |
| Yorkshire and The Humber | 2.01             | [1.89,2.13]** | 1.61                 | [1.51,1.72]** | 1.59             | [1.45,1.74]** | 1.23                 | [1.12,1.35]** |
| East Midlands            | 1.39             | [1.31,1.47]** | 1.14                 | [1.08,1.21]** | 1.25             | [1.14,1.36]** | 0.96                 | [0.87,1.06]   |
| East of England          | 1.02             | [0.97,1.06]   | 0.86                 | [0.81,0.90]** | 1.05             | [0.97,1.14]   | 0.83                 | [0.76,0.90]** |
| Wales                    | 0.42             | [0.20,0.89]*  | 0.37                 | [0.17,0.80]*  | 0.42             | [0.13,1.33]   | 0.36                 | [0.11,1.19]   |
| Missing                  | 1.08             | [1.02,1.15]*  | 0.97                 | [0.91,1.03]   | 0.85             | [0.78,0.93]** | 0.74                 | [0.68,0.82]** |
| IDACI Deciles            |                  |               |                      |               |                  |               |                      |               |
| 1 (deprived)             | 0.75             | [0.71,0.80]** | 0.73                 | [0.68,0.77]** | 0.86             | [0.78,0.95]** | 0.82                 | [0.75,0.90]** |
| 2                        | 0.86             | [0.81,0.91]** | 0.82                 | [0.77,0.87]** | 0.92             | [0.83,1.01]   | 0.88                 | [0.80,0.97]*  |
| 3                        | 0.94             | [0.89,1.00]   | 0.89                 | [0.83,0.94]** | 0.93             | [0.85,1.03]   | 0.90                 | [0.82,1.00]*  |
| 4                        | 0.94             | [0.88,1.00]*  | 0.92                 | [0.86,0.97]** | 1.06             | [0.96,1.17]   | 1.03                 | [0.93,1.14]   |
| 5                        | Ref              |               | Ref                  |               | Ref              |               | Ref                  |               |
| 6                        | 1.05             | [0.99,1.12]   | 1.10                 | [1.03,1.17]** | 0.99             | [0.89,1.09]   | 1.03                 | [0.94,1.14]   |
| 7                        | 1.10             | [1.04,1.17]** | 1.18                 | [1.11,1.26]** | 1.00             | [0.91,1.10]   | 1.11                 | [1.00,1.22]*  |
| 8                        | 1.07             | [1.00,1.14]*  | 1.20                 | [1.13,1.28]** | 0.97             | [0.88,1.07]   | 1.14                 | [1.03,1.25]*  |
| 9                        | 1.16             | [1.09,1.23]** | 1.36                 | [1.27,1.45]** | 1.04             | [0.94,1.15]   | 1.31                 | [1.18,1.45]** |
| 10 (affluent)            | 1.19             | [1.12,1.27]** | 1.48                 | [1.39,1.58]** | 1.11             | [1.01,1.23]*  | 1.57                 | [1.42,1.74]** |
| Missing                  | 0.71             | [0.59,0.85]** | 0.87                 | [0.73,1.05]   | 0.58             | [0.44,0.76]** | 0.80                 | [0.59,1.07]   |
| Observations             |                  |               | 529,910              |               |                  |               | 578,809              |               |
| Pseudo R-squared         |                  |               | 0.026                |               |                  |               | 0.027                |               |



Supplement: ijpds-06-1671-s001.pdf [file ijpds-06-1671-s001.pdf]
